# Supplementary material for: Study on the mechanism of Danshen-Guizhi drug pair in the treatment of ovarian cancer based on network pharmacology and in vitro experiment
Source: PeerJ. 2022 Apr 6;10:e13148. doi: 10.7717/peerj.13148 (PMC8994495; doi:10.7717/peerj.13148)
Supplement: Supplemental Information 1 [file peerj-10-13148-s001.xlsx]

## Sheet: MTS assay
	0μM			10μM				20μM
luteolin	1.072	1.058	1.066	0.789	0.841	0.805	0.72	0.616	0.614
salviolone	1.165	1.088	1.056	0.897	0.791	0.804	0.597	0.632	0.647
beta-sitosterol	1.118	1.076	0.984	0.816	0.819	0.805	0.712	0.734	0.781
tanshinone IIA	1.164	1.12	1.134	0.72	0.716	0.774	0.586	0.577	0.581
the absorbance(OD) was detected at 450nm in SKOV3 cells.
	0μM			10μM			20μM
Luteolin	1.023	1.05	1.059	0.733	0.664	0.733	0.455	0.564	0.588
Salviolone	1.075	1.004	1.015	0.861	0.881	0.794	0.449	0.665	0.548
beta-sitosterol	1.06	1.064	1.071	0.895	0.917	0.87	0.665	0.738	0.688
tanshinone IIA	1.07	1.015	1.03	0.781	0.645	0.512	0.434	0.329	0.438
the absorbance(OD) was detected at 450nm in A2780 cells.

## Sheet: qRT-PCR
Expression of PTGS2 mRNA
salviolone		0μM			20μM
2^ -delta delta Ct	SKOV3 cells	1	1.035	1.014	0.83	0.697	0.702
	A2780 cells	1	0.979	0.989	0.93	0.8	0.891

## Sheet: ELISA assay
Expression of PGE2
salviolone	0μM			20μM
OD(pg/mL)	388	379	352	255	284	233
The absorbance (OD) of the sample was measured at 415nm.
