# Supplementary material for: Study on the mechanism of Danshen-Guizhi drug pair in the treatment of ovarian cancer based on network pharmacology and in vitro experiment
Source: PeerJ. 2022 Apr 6;10:e13148. doi: 10.7717/peerj.13148 (PMC8994495; doi:10.7717/peerj.13148)
Supplement: Supplemental Information 2 [file peerj-10-13148-s002.xlsx]

## Sheet: Sheet1
Table S1: ovarian cancer-related targets
Gene Symbol	Description	Category	Gifts	GC Id	Relevance score
BRCA1	BRCA1 DNA Repair Associated	Protein Coding	50	GC17M043044	331.38
BRCA2	BRCA2 DNA Repair Associated	Protein Coding	49	GC13P032315	321.18
TP53	Tumor Protein P53	Protein Coding	54	GC17M007661	110.57
FSHR	Follicle Stimulating Hormone Receptor	Protein Coding	49	GC02M048953	99.14
RAD51D	RAD51 Paralog D	Protein Coding	40	GC17M035092	91.74
BMP15	Bone Morphogenetic Protein 15	Protein Coding	41	GC0XP050910	74.15
PTEN	Phosphatase And Tensin Homolog	Protein Coding	52	GC10P087863	70.58
RAD51C	RAD51 Paralog C	Protein Coding	43	GC17P058692	69.35
PIK3CA	Phosphatidylinositol-4,5-Bisphosphate 3-Kinase Catalytic Subunit Alpha	Protein Coding	52	GC03P179148	67.19
FOXL2	Forkhead Box L2	Protein Coding	40	GC03M138944	64.87
CDH1	Cadherin 1	Protein Coding	50	GC16P068737	62.82
NOBOX	NOBOX Oogenesis Homeobox	Protein Coding	35	GC07M144397	62.75
POF1B	POF1B Actin Binding Protein	Protein Coding	36	GC0XM085277	62.28
CTNNB1	Catenin Beta 1	Protein Coding	53	GC03P041236	60.86
RAD51L3-RFFL	RAD51L3-RFFL Readthrough	RNA Gene	9	GC17M035009	59.01
NR5A1	Nuclear Receptor Subfamily 5 Group A Member 1	Protein Coding	50	GC09M124481	58.71
ESR1	Estrogen Receptor 1	Protein Coding	53	GC06P151656	57.2
ERBB2	Erb-B2 Receptor Tyrosine Kinase 2	Protein Coding	54	GC17P039687	57.1
ATM	ATM Serine/Threonine Kinase	Protein Coding	54	GC11P108222	56.46
GDF9	Growth Differentiation Factor 9	Protein Coding	39	GC05M132861	56.4
FIGLA	Folliculogenesis Specific BHLH Transcription Factor	Protein Coding	36	GC02M070741	56.32
CYP19A1	Cytochrome P450 Family 19 Subfamily A Member 1	Protein Coding	48	GC15M051208	55.44
AKT1	AKT Serine/Threonine Kinase 1	Protein Coding	54	GC14M104769	54.76
ESR2	Estrogen Receptor 2	Protein Coding	49	GC14M064084	54.68
NBN	Nibrin	Protein Coding	47	GC08M089933	54.44
PALB2	Partner And Localizer Of BRCA2	Protein Coding	43	GC16M023603	54.21
WT1	WT1 Transcription Factor	Protein Coding	49	GC11M032365	53.79
MLH1	MutL Homolog 1	Protein Coding	48	GC03P036993	52.95
KRAS	KRAS Proto-Oncogene, GTPase	Protein Coding	51	GC12M025204	51.16
MSH2	MutS Homolog 2	Protein Coding	48	GC02P047402	49.1
FANCM	FA Complementation Group M	Protein Coding	42	GC14P045135	48.9
BRIP1	BRCA1 Interacting Protein C-Terminal Helicase 1	Protein Coding	47	GC17M061679	47.76
DICER1	Dicer 1, Ribonuclease III	Protein Coding	47	GC14M095086	47.55
MSH6	MutS Homolog 6	Protein Coding	50	GC02P047695	47.46
FMR1	FMRP Translational Regulator 1	Protein Coding	44	GC0XP147913	46.73
BARD1	BRCA1 Associated RING Domain 1	Protein Coding	46	GC02M214725	46.47
CHEK2	Checkpoint Kinase 2	Protein Coding	53	GC22M028687	46.38
STAG3	Stromal Antigen 3	Protein Coding	41	GC07P100177	46.12
LHCGR	Luteinizing Hormone/Choriogonadotropin Receptor	Protein Coding	47	GC02M048647	45.85
TP63	Tumor Protein P63	Protein Coding	48	GC03P189598	45.45
EGFR	Epidermal Growth Factor Receptor	Protein Coding	54	GC07P055019	44.33
GALT	Galactose-1-Phosphate Uridylyltransferase	Protein Coding	47	GC09P034860	44.22
CDKN2A	Cyclin Dependent Kinase Inhibitor 2A	Protein Coding	51	GC09M021967	43.31
RAD50	RAD50 Double Strand Break Repair Protein	Protein Coding	49	GC05P132556	42.97
HFM1	Helicase For Meiosis 1	Protein Coding	39	GC01M091260	42.83
MRE11	MRE11 Homolog, Double Strand Break Repair Nuclease	Protein Coding	41	GC11M094444	42.82
STK11	Serine/Threonine Kinase 11	Protein Coding	49	GC19P001177	41.82
MCM8	Minichromosome Maintenance 8 Homologous Recombination Repair Factor	Protein Coding	40	GC20P005963	41.7
NF1	Neurofibromin 1	Protein Coding	48	GC17P031094	41.22
ERCC6	ERCC Excision Repair 6, Chromatin Remodeling Factor	Protein Coding	45	GC10M049454	41.14
DIAPH2	Diaphanous Related Formin 2	Protein Coding	43	GC0XP096684	40.7
SMAD4	SMAD Family Member 4	Protein Coding	50	GC18P051028	40.45
MYC	MYC Proto-Oncogene, BHLH Transcription Factor	Protein Coding	51	GC08P127735	40.43
MUC16	Mucin 16, Cell Surface Associated	Protein Coding	36	GC19M008848	40.15
PMS2	PMS1 Homolog 2, Mismatch Repair System Component	Protein Coding	48	GC07M005973	40
EPCAM	Epithelial Cell Adhesion Molecule	Protein Coding	47	GC02P047345	39.95
OPCML	Opioid Binding Protein/Cell Adhesion Molecule Like	Protein Coding	41	GC11M132414	39.56
PSMC3IP	PSMC3 Interacting Protein	Protein Coding	39	GC17M042572	39.52
HNF1B	HNF1 Homeobox B	Protein Coding	44	GC17M037686	38.44
BRAF	B-Raf Proto-Oncogene, Serine/Threonine Kinase	Protein Coding	54	GC07M140719	38.4
BLM	BLM RecQ Like Helicase	Protein Coding	48	GC15P090717	38.34
MIR146A	MicroRNA 146a	RNA Gene	22	GC05P160485	37.95
EIF2B2	Eukaryotic Translation Initiation Factor 2B Subunit Beta	Protein Coding	44	GC14P075002	37.86
HRAS	HRas Proto-Oncogene, GTPase	Protein Coding	52	GC11M000635	37.73
CYP17A1	Cytochrome P450 Family 17 Subfamily A Member 1	Protein Coding	48	GC10M102830	37.7
FGFR2	Fibroblast Growth Factor Receptor 2	Protein Coding	54	GC10M121478	37.47
MAP3K1	Mitogen-Activated Protein Kinase Kinase Kinase 1	Protein Coding	49	GC05P056815	37.42
FAS	Fas Cell Surface Death Receptor	Protein Coding	50	GC10P088969	37
FASLG	Fas Ligand	Protein Coding	47	GC01P172628	36.92
RAD51	RAD51 Recombinase	Protein Coding	52	GC15P040694	36.91
MTOR	Mechanistic Target Of Rapamycin Kinase	Protein Coding	54	GC01M011106	36.8
MSH5	MutS Homolog 5	Protein Coding	41	GC06P047322	36.78
NR0B1	Nuclear Receptor Subfamily 0 Group B Member 1	Protein Coding	46	GC0XM030304	36.37
MRPS22	Mitochondrial Ribosomal Protein S22	Protein Coding	41	GC03P139005	35.79
MCM9	Minichromosome Maintenance 9 Homologous Recombination Repair Factor	Protein Coding	39	GC06M118813	35.32
GNRH1	Gonadotropin Releasing Hormone 1	Protein Coding	41	GC08M025419	35.25
PMS1	PMS1 Homolog 1, Mismatch Repair System Component	Protein Coding	40	GC02P189784	35.1
MDM2	MDM2 Proto-Oncogene	Protein Coding	52	GC12P068808	35.02
MSH3	MutS Homolog 3	Protein Coding	43	GC05P080654	34.46
MIR145	MicroRNA 145	RNA Gene	21	GC05P149430	34.45
PPM1D	Protein Phosphatase, Mg2+/Mn2+ Dependent 1D	Protein Coding	47	GC17P060600	34.29
SYCE1	Synaptonemal Complex Central Element Protein 1	Protein Coding	37	GC10M133553	34.28
SOX9	SRY-Box Transcription Factor 9	Protein Coding	47	GC17P072121	34.04
PRKN	Parkin RBR E3 Ubiquitin Protein Ligase	Protein Coding	40	GC06M161348	33.91
FSHB	Follicle Stimulating Hormone Subunit Beta	Protein Coding	43	GC11P030210	33.7
MIR21	MicroRNA 21	RNA Gene	24	GC17P059841	33.64
XRCC2	X-Ray Repair Cross Complementing 2	Protein Coding	42	GC07M152644	33.53
TGFBR2	Transforming Growth Factor Beta Receptor 2	Protein Coding	51	GC03P030623	33.35
INHBA	Inhibin Subunit Beta A	Protein Coding	45	GC07M041668	33.33
RELA	RELA Proto-Oncogene, NF-KB Subunit	Protein Coding	50	GC11M065653	33.05
EIF2B4	Eukaryotic Translation Initiation Factor 2B Subunit Delta	Protein Coding	44	GC02M027364	33.05
WWOX	WW Domain Containing Oxidoreductase	Protein Coding	47	GC16P078099	33.01
GATA4	GATA Binding Protein 4	Protein Coding	48	GC08P011676	32.98
MIR200A	MicroRNA 200a	RNA Gene	21	GC01P001463	32.59
LARS2	Leucyl-TRNA Synthetase 2, Mitochondrial	Protein Coding	45	GC03P045405	32.55
CHEK1	Checkpoint Kinase 1	Protein Coding	50	GC11P125625	32.28
CASP8	Caspase 8	Protein Coding	52	GC02P201233	32.18
RRAS2	RAS Related 2	Protein Coding	46	GC11M014299	31.6
ABRAXAS1	Abraxas 1, BRCA1 A Complex Subunit	Protein Coding	30	GC04M083460	31.56
MIR17	MicroRNA 17	RNA Gene	21	GC13P091350	31.55
AARS2	Alanyl-TRNA Synthetase 2, Mitochondrial	Protein Coding	42	GC06M044297	31.52
VEGFA	Vascular Endothelial Growth Factor A	Protein Coding	48	GC06P043770	31.14
MIR125A	MicroRNA 125a	RNA Gene	21	GC19P051720	31.14
MIR27A	MicroRNA 27a	RNA Gene	22	GC19M014010	30.82
BMP4	Bone Morphogenetic Protein 4	Protein Coding	49	GC14M053949	30.82
RB1	RB Transcriptional Corepressor 1	Protein Coding	49	GC13P048303	30.74
MIR141	MicroRNA 141	RNA Gene	21	GC12P008231	30.56
MIR143	MicroRNA 143	RNA Gene	22	GC05P149410	30.52
MIR200B	MicroRNA 200b	RNA Gene	20	GC01P001167	30.43
IGF1	Insulin Like Growth Factor 1	Protein Coding	50	GC12M102395	30.37
INS	Insulin	Protein Coding	48	GC11M002159	30.17
OVCAS1	Ovarian Cancer, Epithelial, Susceptibility To	Genetic Locus	2	GC03U900587	30.14
INHA	Inhibin Subunit Alpha	Protein Coding	43	GC02P219569	30.13
MIR182	MicroRNA 182	RNA Gene	20	GC07M129770	30.08
MIR200C	MicroRNA 200c	RNA Gene	21	GC12P008229	30.01
MIR34C	MicroRNA 34c	RNA Gene	21	GC11P111582	29.71
MIR223	MicroRNA 223	RNA Gene	21	GC0XP066018	29.54
MIR222	MicroRNA 222	RNA Gene	21	GC0XM045747	29.45
PGR	Progesterone Receptor	Protein Coding	50	GC11M100943	29.34
MIR10B	MicroRNA 10b	RNA Gene	21	GC02P176150	29.27
MIR483	MicroRNA 483	RNA Gene	18	GC11M002188	29.07
BUB1B	BUB1 Mitotic Checkpoint Serine/Threonine Kinase B	Protein Coding	49	GC15P040161	28.84
SOHLH1	Spermatogenesis And Oogenesis Specific Basic Helix-Loop-Helix 1	Protein Coding	35	GC09M135693	28.8
WNT4	Wnt Family Member 4	Protein Coding	47	GC01M022190	28.71
MIR126	MicroRNA 126	RNA Gene	22	GC09P136670	28.61
POLG	DNA Polymerase Gamma, Catalytic Subunit	Protein Coding	45	GC15M089316	28.6
MSLN	Mesothelin	Protein Coding	40	GC16P001407	28.57
MIR214	MicroRNA 214	RNA Gene	20	GC01M172234	28.56
SRY	Sex Determining Region Y	Protein Coding	35	GC0YM002698	28.36
PHB	Prohibitin	Protein Coding	47	GC17M049404	28.35
MIR34A	MicroRNA 34a	RNA Gene	22	GC01M009151	28.33
MIR205	MicroRNA 205	RNA Gene	20	GC01P209432	28.25
MIRLET7I	MicroRNA Let-7i	RNA Gene	20	GC12P062606	28.11
AMH	Anti-Mullerian Hormone	Protein Coding	43	GC19P002251	27.98
MIR31	MicroRNA 31	RNA Gene	20	GC09M021513	27.81
ETV4	ETS Variant Transcription Factor 4	Protein Coding	43	GC17M043527	27.8
HSD17B4	Hydroxysteroid 17-Beta Dehydrogenase 4	Protein Coding	46	GC05P119452	27.71
MIR155	MicroRNA 155	RNA Gene	18	GC21P025573	27.67
MIR221	MicroRNA 221	RNA Gene	20	GC0XM045746	27.62
DPH1	Diphthamide Biosynthesis 1	Protein Coding	40	GC17P002030	27.57
NUP107	Nucleoporin 107	Protein Coding	43	GC12P068686	27.3
MIRLET7D	MicroRNA Let-7d	RNA Gene	21	GC09P094178	27.28
MIR210	MicroRNA 210	RNA Gene	21	GC11M000674	27.28
MIR30E	MicroRNA 30e	RNA Gene	21	GC01P040754	27.26
MIR335	MicroRNA 335	RNA Gene	18	GC07P130496	27.26
BNC1	Basonuclin 1	Protein Coding	36	GC15M083255	27.24
MIR429	MicroRNA 429	RNA Gene	19	GC01P001464	27.01
MIR206	MicroRNA 206	RNA Gene	20	GC06P052144	26.93
MIR127	MicroRNA 127	RNA Gene	20	GC14P104580	26.88
MIRLET7A3	MicroRNA Let-7a-3	RNA Gene	19	GC22P046112	26.66
CLPP	Caseinolytic Mitochondrial Matrix Peptidase Proteolytic Subunit	Protein Coding	44	GC19P006389	26.65
MUC1	Mucin 1, Cell Surface Associated	Protein Coding	47	GC01M155185	26.58
LOC111589215	BRCA1 Promoter Region	Biological Region	1	GC17P044050	26.54
INSR	Insulin Receptor	Protein Coding	54	GC19M007112	26.53
MIR377	MicroRNA 377	RNA Gene	17	GC14P104794	26.5
MIR199B	MicroRNA 199b	RNA Gene	19	GC09M128244	26.29
GNAS	GNAS Complex Locus	Protein Coding	50	GC20P058839	26.26
MIR146B	MicroRNA 146b	RNA Gene	19	GC10P102436	26.17
MIR376C	MicroRNA 376c	RNA Gene	17	GC14P104793	26
MIRLET7G	MicroRNA Let-7g	RNA Gene	20	GC03M052268	25.92
MIR34B	MicroRNA 34b	RNA Gene	21	GC11P111546	25.89
MIR376A1	MicroRNA 376a-1	RNA Gene	15	GC14P104790	25.7
KRT7	Keratin 7	Protein Coding	41	GC12P052232	25.6
MIRLET7C	MicroRNA Let-7c	RNA Gene	21	GC21P016551	25.51
WFDC2	WAP Four-Disulfide Core Domain 2	Protein Coding	38	GC20P045469	25.37
MIR376B	MicroRNA 376b	RNA Gene	14	GC14P104792	25.32
MIR495	MicroRNA 495	RNA Gene	16	GC14P104815	25.26
AIRE	Autoimmune Regulator	Protein Coding	44	GC21P044285	25.16
MIR337	MicroRNA 337	RNA Gene	18	GC14P104787	25.13
MIR432	MicroRNA 432	RNA Gene	17	GC14P104581	25.13
GNRHR	Gonadotropin Releasing Hormone Receptor	Protein Coding	47	GC04M067737	25.06
CGA	Glycoprotein Hormones, Alpha Polypeptide	Protein Coding	43	GC06M087085	25.04
SGO2	Shugoshin 2	Protein Coding	29	GC02P200511	24.89
MMP2	Matrix Metallopeptidase 2	Protein Coding	53	GC16P055390	24.73
AR	Androgen Receptor	Protein Coding	53	GC0XP067544	24.6
OVCA2	OVCA2 Serine Hydrolase Domain Containing	Protein Coding	35	GC17P002041	24.25
FOXO3	Forkhead Box O3	Protein Coding	44	GC06P108559	23.95
FBXW7	F-Box And WD Repeat Domain Containing 7	Protein Coding	44	GC04M152321	23.86
CDKN1B	Cyclin Dependent Kinase Inhibitor 1B	Protein Coding	48	GC12P012716	23.84
MAPK1	Mitogen-Activated Protein Kinase 1	Protein Coding	51	GC22M021754	23.77
ABCB1	ATP Binding Cassette Subfamily B Member 1	Protein Coding	51	GC07M087504	23.75
BCL2	BCL2 Apoptosis Regulator	Protein Coding	51	GC18M063123	23.58
IGFBP3	Insulin Like Growth Factor Binding Protein 3	Protein Coding	45	GC07M045912	23.49
PREPL	Prolyl Endopeptidase Like	Protein Coding	41	GC02M044281	23.42
TNF	Tumor Necrosis Factor	Protein Coding	51	GC06P047305	23.28
IL6	Interleukin 6	Protein Coding	50	GC07P022765	23.2
DAB2	DAB Adaptor Protein 2	Protein Coding	43	GC05M039371	23.18
AFP	Alpha Fetoprotein	Protein Coding	45	GC04P073431	23.06
AMHR2	Anti-Mullerian Hormone Receptor Type 2	Protein Coding	45	GC12P053423	23.04
CDKN1A	Cyclin Dependent Kinase Inhibitor 1A	Protein Coding	50	GC06P047460	22.99
CALB2	Calbindin 2	Protein Coding	40	GC16P071392	22.89
PTGS2	Prostaglandin-Endoperoxide Synthase 2	Protein Coding	48	GC01M186640	22.74
POU5F1	POU Class 5 Homeobox 1	Protein Coding	47	GC06M031184	22.7
CASP3	Caspase 3	Protein Coding	50	GC04M184627	22.69
BIRC5	Baculoviral IAP Repeat Containing 5	Protein Coding	47	GC17P078214	22.68
MMP14	Matrix Metallopeptidase 14	Protein Coding	51	GC14P025277	22.64
TERT	Telomerase Reverse Transcriptase	Protein Coding	51	GC05M001253	22.56
VIM	Vimentin	Protein Coding	50	GC10P017227	22.53
OCIAD1	OCIA Domain Containing 1	Protein Coding	35	GC04P048805	22.48
ERBB3	Erb-B2 Receptor Tyrosine Kinase 3	Protein Coding	54	GC12P056094	22.47
BAX	BCL2 Associated X, Apoptosis Regulator	Protein Coding	48	GC19P048954	22.43
FST	Follistatin	Protein Coding	46	GC05P053480	22.15
PRL	Prolactin	Protein Coding	44	GC06M022230	22.03
EGF	Epidermal Growth Factor	Protein Coding	51	GC04P109912	21.9
AKT2	AKT Serine/Threonine Kinase 2	Protein Coding	54	GC19M040230	21.83
STAT3	Signal Transducer And Activator Of Transcription 3	Protein Coding	52	GC17M042313	21.8
IGF1R	Insulin Like Growth Factor 1 Receptor	Protein Coding	54	GC15P098648	21.69
CD44	CD44 Molecule (Indian Blood Group)	Protein Coding	47	GC11P035139	21.67
PAX8	Paired Box 8	Protein Coding	46	GC02M113215	21.64
CCND1	Cyclin D1	Protein Coding	52	GC11P069641	21.41
SHBG	Sex Hormone Binding Globulin	Protein Coding	40	GC17P007613	21.32
LMNA	Lamin A/C	Protein Coding	47	GC01P156082	21.26
PTK2	Protein Tyrosine Kinase 2	Protein Coding	47	GC08M140657	21.22
FLT1	Fms Related Receptor Tyrosine Kinase 1	Protein Coding	51	GC13M028300	21.22
HIF1A	Hypoxia Inducible Factor 1 Subunit Alpha	Protein Coding	47	GC14P061695	21.19
JUN	Jun Proto-Oncogene, AP-1 Transcription Factor Subunit	Protein Coding	49	GC01M058780	21.19
GPR68	G Protein-Coupled Receptor 68	Protein Coding	43	GC14M091232	21.04
TGFB1	Transforming Growth Factor Beta 1	Protein Coding	52	GC19M041301	20.99
KRT20	Keratin 20	Protein Coding	41	GC17M040875	20.97
LOC106721785	BRCA2 Promoter/Silencer Region	Biological Region	1	GC13P032314	20.9
CCND2	Cyclin D2	Protein Coding	50	GC12P008103	20.87
PAEP	Progestagen Associated Endometrial Protein	Protein Coding	39	GC09P135561	20.85
KLK8	Kallikrein Related Peptidase 8	Protein Coding	41	GC19M050996	20.84
ARID1A	AT-Rich Interaction Domain 1A	Protein Coding	44	GC01P026693	20.82
SULF1	Sulfatase 1	Protein Coding	41	GC08P069466	20.71
KIT	KIT Proto-Oncogene, Receptor Tyrosine Kinase	Protein Coding	53	GC04P054657	20.66
IGF2	Insulin Like Growth Factor 2	Protein Coding	48	GC11M002130	20.59
RAD51B	RAD51 Paralog B	Protein Coding	37	GC14P067819	20.57
BCL2L1	BCL2 Like 1	Protein Coding	47	GC20M031664	20.52
MMP9	Matrix Metallopeptidase 9	Protein Coding	52	GC20P046008	20.46
RECQL	RecQ Like Helicase	Protein Coding	41	GC12M021468	20.43
CAV1	Caveolin 1	Protein Coding	48	GC07P116524	20.42
FOS	Fos Proto-Oncogene, AP-1 Transcription Factor Subunit	Protein Coding	50	GC14P075278	20.29
EIF2B5	Eukaryotic Translation Initiation Factor 2B Subunit Epsilon	Protein Coding	43	GC03P184135	19.99
NACC1	Nucleus Accumbens Associated 1	Protein Coding	40	GC19P013117	19.97
NFKB1	Nuclear Factor Kappa B Subunit 1	Protein Coding	52	GC04P102501	19.91
FANCC	FA Complementation Group C	Protein Coding	47	GC09M095099	19.91
CYP11A1	Cytochrome P450 Family 11 Subfamily A Member 1	Protein Coding	48	GC15M074337	19.87
CDK4	Cyclin Dependent Kinase 4	Protein Coding	54	GC12M057743	19.8
CEACAM5	CEA Cell Adhesion Molecule 5	Protein Coding	41	GC19P041709	19.78
MUC5AC	Mucin 5AC, Oligomeric Mucus/Gel-Forming	Protein Coding	39	GC11P001151	19.77
APC	APC Regulator Of WNT Signaling Pathway	Protein Coding	48	GC05P112707	19.72
URI1	URI1 Prefoldin Like Chaperone	Protein Coding	36	GC19P029923	19.7
FGFR1	Fibroblast Growth Factor Receptor 1	Protein Coding	55	GC08M038400	19.61
NBR1	NBR1 Autophagy Cargo Receptor	Protein Coding	39	GC17P043170	19.55
SRC	SRC Proto-Oncogene, Non-Receptor Tyrosine Kinase	Protein Coding	51	GC20P037344	19.52
DIRAS3	DIRAS Family GTPase 3	Protein Coding	32	GC01M068045	19.51
MMP1	Matrix Metallopeptidase 1	Protein Coding	51	GC11M102810	19.47
CSF3	Colony Stimulating Factor 3	Protein Coding	40	GC17P040015	19.47
PTCH1	Patched 1	Protein Coding	50	GC09M095442	19.38
CXCL8	C-X-C Motif Chemokine Ligand 8	Protein Coding	41	GC04P073740	19.37
CCNE1	Cyclin E1	Protein Coding	48	GC19P029811	19.36
ERCC1	ERCC Excision Repair 1, Endonuclease Non-Catalytic Subunit	Protein Coding	45	GC19M045409	19.35
FOLR1	Folate Receptor Alpha	Protein Coding	47	GC11P072190	19.34
MIR139	MicroRNA 139	RNA Gene	19	GC11M072615	19.28
KDR	Kinase Insert Domain Receptor	Protein Coding	53	GC04M055078	19.23
SLC35C2	Solute Carrier Family 35 Member C2	Protein Coding	37	GC20M046345	19.23
IGFBP2	Insulin Like Growth Factor Binding Protein 2	Protein Coding	43	GC02P216632	19.2
BMP6	Bone Morphogenetic Protein 6	Protein Coding	43	GC06P007726	19.16
HSD17B1	Hydroxysteroid 17-Beta Dehydrogenase 1	Protein Coding	43	GC17P042548	19.16
AURKA	Aurora Kinase A	Protein Coding	50	GC20M056370	19.09
FGF2	Fibroblast Growth Factor 2	Protein Coding	47	GC04P122826	19.07
PLAU	Plasminogen Activator, Urokinase	Protein Coding	51	GC10P073909	19.06
ZP3	Zona Pellucida Glycoprotein 3	Protein Coding	41	GC07P076398	19.02
CYP1A1	Cytochrome P450 Family 1 Subfamily A Member 1	Protein Coding	47	GC15M074719	18.97
CSF1	Colony Stimulating Factor 1	Protein Coding	43	GC01P109911	18.91
ALB	Albumin	Protein Coding	50	GC04P073397	18.89
FILIP1L	Filamin A Interacting Protein 1 Like	Protein Coding	35	GC03M099830	18.88
GSTP1	Glutathione S-Transferase Pi 1	Protein Coding	50	GC11P067583	18.87
H19	H19 Imprinted Maternally Expressed Transcript	RNA Gene	28	GC11M001995	18.86
STAR	Steroidogenic Acute Regulatory Protein	Protein Coding	46	GC08M038145	18.84
RPS6KB1	Ribosomal Protein S6 Kinase B1	Protein Coding	49	GC17P059893	18.84
PARP1	Poly(ADP-Ribose) Polymerase 1	Protein Coding	49	GC01M226360	18.8
ALPP	Alkaline Phosphatase, Placental	Protein Coding	46	GC02P232378	18.77
LGR6	Leucine Rich Repeat Containing G Protein-Coupled Receptor 6	Protein Coding	41	GC01P202193	18.77
KISS1	KiSS-1 Metastasis Suppressor	Protein Coding	41	GC01M204190	18.75
AGR3	Anterior Gradient 3, Protein Disulphide Isomerase Family Member	Protein Coding	37	GC07M016854	18.74
THBS1	Thrombospondin 1	Protein Coding	44	GC15P039581	18.66
SERPINE1	Serpin Family E Member 1	Protein Coding	50	GC07P101127	18.65
KLK7	Kallikrein Related Peptidase 7	Protein Coding	40	GC19M050977	18.65
TNFRSF10B	TNF Receptor Superfamily Member 10b	Protein Coding	50	GC08M023020	18.65
AXIN1	Axin 1	Protein Coding	47	GC16M000287	18.62
CTNNA1	Catenin Alpha 1	Protein Coding	47	GC05P138613	18.59
HSPB1	Heat Shock Protein Family B (Small) Member 1	Protein Coding	51	GC07P076302	18.58
ITGAV	Integrin Subunit Alpha V	Protein Coding	46	GC02P186589	18.57
ANXA5	Annexin A5	Protein Coding	46	GC04M121667	18.57
TGFA	Transforming Growth Factor Alpha	Protein Coding	46	GC02M070447	18.52
LEP	Leptin	Protein Coding	47	GC07P128241	18.51
TWNK	Twinkle MtDNA Helicase	Protein Coding	33	GC10P100993	18.49
TNFSF10	TNF Superfamily Member 10	Protein Coding	46	GC03M172505	18.47
SPIN1	Spindlin 1	Protein Coding	37	GC09P088388	18.45
GPER1	G Protein-Coupled Estrogen Receptor 1	Protein Coding	37	GC07P001188	18.45
ABCG2	ATP Binding Cassette Subfamily G Member 2 (Junior Blood Group)	Protein Coding	50	GC04M088090	18.42
CD274	CD274 Molecule	Protein Coding	44	GC09P005450	18.38
SMAD3	SMAD Family Member 3	Protein Coding	49	GC15P067063	18.37
CYP1B1	Cytochrome P450 Family 1 Subfamily B Member 1	Protein Coding	48	GC02M038034	18.34
ERN1	Endoplasmic Reticulum To Nucleus Signaling 1	Protein Coding	45	GC17M064039	18.33
SMAD7	SMAD Family Member 7	Protein Coding	43	GC18M048919	18.3
ETS1	ETS Proto-Oncogene 1, Transcription Factor	Protein Coding	49	GC11M128458	18.29
MAPK3	Mitogen-Activated Protein Kinase 3	Protein Coding	49	GC16M030117	18.28
XIAP	X-Linked Inhibitor Of Apoptosis	Protein Coding	49	GC0XP123859	18.26
ERAL1	Era Like 12S Mitochondrial RRNA Chaperone 1	Protein Coding	39	GC17P028854	18.25
MET	MET Proto-Oncogene, Receptor Tyrosine Kinase	Protein Coding	54	GC07P116672	18.21
PVT1	Pvt1 Oncogene	RNA Gene	25	GC08P127804	18.2
ITGB3	Integrin Subunit Beta 3	Protein Coding	49	GC17P047254	18.15
NTRK1	Neurotrophic Receptor Tyrosine Kinase 1	Protein Coding	48	GC01P156786	18.14
RAF1	Raf-1 Proto-Oncogene, Serine/Threonine Kinase	Protein Coding	54	GC03M012583	18.13
RHOA	Ras Homolog Family Member A	Protein Coding	46	GC03M049359	18.11
CERNA2	Competing Endogenous LncRNA 2 For MicroRNA Let-7b	RNA Gene	10	GC10M084169	18.1
BCL2L11	BCL2 Like 11	Protein Coding	45	GC02P111119	18.07
LPAR3	Lysophosphatidic Acid Receptor 3	Protein Coding	43	GC01M084811	18.02
HDAC1	Histone Deacetylase 1	Protein Coding	49	GC01P032292	18
CUZD1	CUB And Zona Pellucida Like Domains 1	Protein Coding	36	GC10M122833	17.99
NQO1	NAD(P)H Quinone Dehydrogenase 1	Protein Coding	49	GC16M069706	17.95
CDK2	Cyclin Dependent Kinase 2	Protein Coding	52	GC12P055966	17.92
ABCC1	ATP Binding Cassette Subfamily C Member 1	Protein Coding	47	GC16P015949	17.92
CXCL12	C-X-C Motif Chemokine Ligand 12	Protein Coding	45	GC10M044294	17.9
FBLN1	Fibulin 1	Protein Coding	43	GC22P045502	17.89
MAP2K4	Mitogen-Activated Protein Kinase Kinase 4	Protein Coding	46	GC17P012020	17.89
MUC4	Mucin 4, Cell Surface Associated	Protein Coding	38	GC03M195746	17.88
NOTCH1	Notch Receptor 1	Protein Coding	51	GC09M136602	17.79
MAP2K1	Mitogen-Activated Protein Kinase Kinase 1	Protein Coding	54	GC15P066386	17.79
CXCR4	C-X-C Motif Chemokine Receptor 4	Protein Coding	52	GC02M136114	17.78
ZNF268	Zinc Finger Protein 268	Protein Coding	36	GC12P133181	17.77
JAK2	Janus Kinase 2	Protein Coding	54	GC09P004985	17.73
NCOA3	Nuclear Receptor Coactivator 3	Protein Coding	45	GC20P047501	17.72
NRG1	Neuregulin 1	Protein Coding	46	GC08P031639	17.71
AKT3	AKT Serine/Threonine Kinase 3	Protein Coding	52	GC01M243488	17.69
MVP	Major Vault Protein	Protein Coding	39	GC16P030094	17.69
BSG	Basigin (Ok Blood Group)	Protein Coding	44	GC19P000571	17.68
CDH13	Cadherin 13	Protein Coding	42	GC16P082626	17.67
SEPTIN9	Septin 9	Protein Coding	35	GC17P077282	17.65
CLDN4	Claudin 4	Protein Coding	41	GC07P073799	17.64
MAPK8	Mitogen-Activated Protein Kinase 8	Protein Coding	50	GC10P048306	17.62
TOP1	DNA Topoisomerase I	Protein Coding	48	GC20P041028	17.62
CLDN3	Claudin 3	Protein Coding	40	GC07M073768	17.59
IFNG	Interferon Gamma	Protein Coding	48	GC12M068064	17.59
GPC3	Glypican 3	Protein Coding	45	GC0XM133535	17.57
TGIF2	TGFB Induced Factor Homeobox 2	Protein Coding	39	GC20P036573	17.57
TEK	TEK Receptor Tyrosine Kinase	Protein Coding	50	GC09P027109	17.56
IL10	Interleukin 10	Protein Coding	47	GC01M206767	17.56
EMSY	EMSY Transcriptional Repressor, BRCA2 Interacting	Protein Coding	31	GC11P076445	17.56
ZEB1	Zinc Finger E-Box Binding Homeobox 1	Protein Coding	48	GC10P031318	17.53
HSPA5	Heat Shock Protein Family A (Hsp70) Member 5	Protein Coding	47	GC09M125234	17.51
OVAAL	Ovarian Adenocarcinoma Amplified Long Non-Coding RNA	RNA Gene	14	GC01P180558	17.49
CASP9	Caspase 9	Protein Coding	48	GC01M015491	17.41
IRS1	Insulin Receptor Substrate 1	Protein Coding	47	GC02M226731	17.38
SIRT1	Sirtuin 1	Protein Coding	49	GC10P067884	17.38
ABL1	ABL Proto-Oncogene 1, Non-Receptor Tyrosine Kinase	Protein Coding	52	GC09P130713	17.38
HGF	Hepatocyte Growth Factor	Protein Coding	52	GC07M081699	17.37
FN1	Fibronectin 1	Protein Coding	50	GC02M215360	17.36
SPP1	Secreted Phosphoprotein 1	Protein Coding	46	GC04P087975	17.33
EDN1	Endothelin 1	Protein Coding	47	GC06P012290	17.33
CDKN2B	Cyclin Dependent Kinase Inhibitor 2B	Protein Coding	47	GC09M022002	17.31
SERPINB5	Serpin Family B Member 5	Protein Coding	43	GC18P063476	17.31
MIR9-1	MicroRNA 9-1	RNA Gene	20	GC01M156420	17.31
RAB25	RAB25, Member RAS Oncogene Family	Protein Coding	39	GC01P156061	17.3
POMC	Proopiomelanocortin	Protein Coding	48	GC02M025160	17.28
ST14	ST14 Transmembrane Serine Protease Matriptase	Protein Coding	45	GC11P130159	17.27
TIMP2	TIMP Metallopeptidase Inhibitor 2	Protein Coding	44	GC17M078852	17.26
JUND	JunD Proto-Oncogene, AP-1 Transcription Factor Subunit	Protein Coding	41	GC19M018279	17.26
NME1	NME/NM23 Nucleoside Diphosphate Kinase 1	Protein Coding	47	GC17P051154	17.26
MMP7	Matrix Metallopeptidase 7	Protein Coding	48	GC11M102425	17.25
SMARCA4	SWI/SNF Related, Matrix Associated, Actin Dependent Regulator Of Chromatin, Subfamily A, Member 4	Protein Coding	50	GC19P010932	17.24
CDH5	Cadherin 5	Protein Coding	47	GC16P066366	17.21
CSF1R	Colony Stimulating Factor 1 Receptor	Protein Coding	52	GC05M150053	17.21
EDNRA	Endothelin Receptor Type A	Protein Coding	49	GC04P147480	17.19
IL1A	Interleukin 1 Alpha	Protein Coding	44	GC02M112773	17.19
CDR2	Cerebellar Degeneration Related Protein 2	Protein Coding	37	GC16M022357	17.18
CLDN7	Claudin 7	Protein Coding	41	GC17M007259	17.15
EZH2	Enhancer Of Zeste 2 Polycomb Repressive Complex 2 Subunit	Protein Coding	54	GC07M148807	17.13
RASSF1	Ras Association Domain Family Member 1	Protein Coding	44	GC03M050329	17.13
IL1B	Interleukin 1 Beta	Protein Coding	48	GC02M112829	17.13
IL2	Interleukin 2	Protein Coding	45	GC04M122451	17.1
ICAM1	Intercellular Adhesion Molecule 1	Protein Coding	50	GC19P010270	17.1
MAPK14	Mitogen-Activated Protein Kinase 14	Protein Coding	51	GC06P047451	17.1
CASP7	Caspase 7	Protein Coding	50	GC10P113679	17.08
TYMP	Thymidine Phosphorylase	Protein Coding	46	GC22M050525	17.04
SNAI1	Snail Family Transcriptional Repressor 1	Protein Coding	44	GC20P049982	16.98
VTCN1	V-Set Domain Containing T Cell Activation Inhibitor 1	Protein Coding	40	GC01M117143	16.95
TYMS	Thymidylate Synthetase	Protein Coding	47	GC18P000657	16.92
CFLAR	CASP8 And FADD Like Apoptosis Regulator	Protein Coding	46	GC02P201117	16.92
MIR30A	MicroRNA 30a	RNA Gene	20	GC06M071403	16.9
FSCN1	Fascin Actin-Bundling Protein 1	Protein Coding	43	GC07P005592	16.89
AREG	Amphiregulin	Protein Coding	43	GC04P074445	16.89
ATR	ATR Serine/Threonine Kinase	Protein Coding	51	GC03M142449	16.87
MCL1	MCL1 Apoptosis Regulator, BCL2 Family Member	Protein Coding	47	GC01M150707	16.85
APOE	Apolipoprotein E	Protein Coding	50	GC19P044906	16.85
DIABLO	Diablo IAP-Binding Mitochondrial Protein	Protein Coding	47	GC12M122208	16.83
SQSTM1	Sequestosome 1	Protein Coding	48	GC05P179806	16.82
MTA1	Metastasis Associated 1	Protein Coding	42	GC14P105419	16.81
PIK3CG	Phosphatidylinositol-4,5-Bisphosphate 3-Kinase Catalytic Subunit Gamma	Protein Coding	48	GC07P106865	16.79
ERBB4	Erb-B2 Receptor Tyrosine Kinase 4	Protein Coding	55	GC02M211375	16.78
EIF2B1	Eukaryotic Translation Initiation Factor 2B Subunit Alpha	Protein Coding	43	GC12M123620	16.75
PLCG1	Phospholipase C Gamma 1	Protein Coding	47	GC20P041136	16.75
KISS1R	KISS1 Receptor	Protein Coding	44	GC19P000917	16.74
HSPD1	Heat Shock Protein Family D (Hsp60) Member 1	Protein Coding	47	GC02M197486	16.74
KRT18	Keratin 18	Protein Coding	48	GC12P052948	16.73
EIF2B3	Eukaryotic Translation Initiation Factor 2B Subunit Gamma	Protein Coding	42	GC01M044850	16.73
SNAI2	Snail Family Transcriptional Repressor 2	Protein Coding	44	GC08M048854	16.7
MIR135A1	MicroRNA 135a-1	RNA Gene	20	GC03M052296	16.67
TIMP1	TIMP Metallopeptidase Inhibitor 1	Protein Coding	45	GC0XP047583	16.67
TP73	Tumor Protein P73	Protein Coding	45	GC01P003652	16.67
CDH2	Cadherin 2	Protein Coding	50	GC18M027950	16.66
CCNA2	Cyclin A2	Protein Coding	44	GC04M121816	16.66
GAPDH	Glyceraldehyde-3-Phosphate Dehydrogenase	Protein Coding	48	GC12P008161	16.66
PTK2B	Protein Tyrosine Kinase 2 Beta	Protein Coding	49	GC08P027311	16.65
PLAUR	Plasminogen Activator, Urokinase Receptor	Protein Coding	44	GC19M043646	16.62
SOCS3	Suppressor Of Cytokine Signaling 3	Protein Coding	44	GC17M078356	16.61
CXCL1	C-X-C Motif Chemokine Ligand 1	Protein Coding	43	GC04P073869	16.6
VEGFC	Vascular Endothelial Growth Factor C	Protein Coding	47	GC04M176683	16.59
KLK6	Kallikrein Related Peptidase 6	Protein Coding	42	GC19M050958	16.58
SLC2A1	Solute Carrier Family 2 Member 1	Protein Coding	52	GC01M042925	16.55
TGFB2	Transforming Growth Factor Beta 2	Protein Coding	50	GC01P218345	16.55
PTGS1	Prostaglandin-Endoperoxide Synthase 1	Protein Coding	46	GC09P122370	16.52
EEF1A2	Eukaryotic Translation Elongation Factor 1 Alpha 2	Protein Coding	45	GC20M063488	16.52
PDGFRB	Platelet Derived Growth Factor Receptor Beta	Protein Coding	55	GC05M150113	16.5
CLU	Clusterin	Protein Coding	46	GC08M027596	16.48
NOTCH3	Notch Receptor 3	Protein Coding	49	GC19M015159	16.48
TWIST1	Twist Family BHLH Transcription Factor 1	Protein Coding	45	GC07M019020	16.45
SOX2	SRY-Box Transcription Factor 2	Protein Coding	47	GC03P181711	16.43
PECAM1	Platelet And Endothelial Cell Adhesion Molecule 1	Protein Coding	40	GC17M064319	16.43
E2F1	E2F Transcription Factor 1	Protein Coding	43	GC20M033675	16.42
SP1	Sp1 Transcription Factor	Protein Coding	44	GC12P053380	16.42
TMPRSS3	Transmembrane Serine Protease 3	Protein Coding	41	GC21M042371	16.41
TOP2A	DNA Topoisomerase II Alpha	Protein Coding	50	GC17M040388	16.4
ITGB1	Integrin Subunit Beta 1	Protein Coding	50	GC10M032900	16.39
TUSC3	Tumor Suppressor Candidate 3	Protein Coding	41	GC08P015417	16.38
PDGFRA	Platelet Derived Growth Factor Receptor Alpha	Protein Coding	55	GC04P054229	16.36
MIR199A1	MicroRNA 199a-1	RNA Gene	18	GC19M010792	16.35
PAK2	P21 (RAC1) Activated Kinase 2	Protein Coding	46	GC03P196739	16.34
CDK1	Cyclin Dependent Kinase 1	Protein Coding	45	GC10P060772	16.34
DNMT1	DNA Methyltransferase 1	Protein Coding	50	GC19M010133	16.33
CYCS	Cytochrome C, Somatic	Protein Coding	48	GC07M025118	16.32
GCLC	Glutamate-Cysteine Ligase Catalytic Subunit	Protein Coding	43	GC06M053497	16.31
HOTAIR	HOX Transcript Antisense RNA	RNA Gene	25	GC12M053962	16.25
HELLS	Helicase, Lymphoid Specific	Protein Coding	45	GC10P094501	16.24
HBEGF	Heparin Binding EGF Like Growth Factor	Protein Coding	43	GC05M140332	16.23
F2R	Coagulation Factor II Thrombin Receptor	Protein Coding	46	GC05P076716	16.21
SERPINA3	Serpin Family A Member 3	Protein Coding	43	GC14P094612	16.2
ALDH1A1	Aldehyde Dehydrogenase 1 Family Member A1	Protein Coding	47	GC09M072900	16.2
SMAD2	SMAD Family Member 2	Protein Coding	47	GC18M047809	16.19
GJA1	Gap Junction Protein Alpha 1	Protein Coding	50	GC06P121436	16.19
ERCC2	ERCC Excision Repair 2, TFIIH Core Complex Helicase Subunit	Protein Coding	47	GC19M045349	16.19
IFI27	Interferon Alpha Inducible Protein 27	Protein Coding	37	GC14P094104	16.18
YAP1	Yes1 Associated Transcriptional Regulator	Protein Coding	47	GC11P102110	16.17
MGMT	O-6-Methylguanine-DNA Methyltransferase	Protein Coding	50	GC10P129467	16.16
HMGA2	High Mobility Group AT-Hook 2	Protein Coding	44	GC12P065824	16.16
PDCD4	Programmed Cell Death 4	Protein Coding	43	GC10P110871	16.16
PROM1	Prominin 1	Protein Coding	44	GC04M015965	16.16
SELENBP1	Selenium Binding Protein 1	Protein Coding	43	GC01M151364	16.16
ANGPT2	Angiopoietin 2	Protein Coding	44	GC08M006499	16.14
MFAP5	Microfibril Associated Protein 5	Protein Coding	41	GC12M008637	16.14
CD24	CD24 Molecule	Protein Coding	33	GC06M106969	16.14
FOXM1	Forkhead Box M1	Protein Coding	44	GC12M002857	16.14
TUBB	Tubulin Beta Class I	Protein Coding	49	GC06P030720	16.13
GADD45A	Growth Arrest And DNA Damage Inducible Alpha	Protein Coding	44	GC01P067685	16.13
BMP2	Bone Morphogenetic Protein 2	Protein Coding	47	GC20P006696	16.11
VAV3	Vav Guanine Nucleotide Exchange Factor 3	Protein Coding	43	GC01M107571	16.09
SPINK1	Serine Peptidase Inhibitor Kazal Type 1	Protein Coding	43	GC05M147825	16.08
CLEC3B	C-Type Lectin Domain Family 3 Member B	Protein Coding	40	GC03P045357	16.08
CDK6	Cyclin Dependent Kinase 6	Protein Coding	54	GC07M092604	16.07
JAK1	Janus Kinase 1	Protein Coding	50	GC01M064833	16.05
RPS6KA2	Ribosomal Protein S6 Kinase A2	Protein Coding	46	GC06M166409	16.05
KLK10	Kallikrein Related Peptidase 10	Protein Coding	40	GC19M051012	16.04
MIR93	MicroRNA 93	RNA Gene	20	GC07M100282	16.02
MALAT1	Metastasis Associated Lung Adenocarcinoma Transcript 1	RNA Gene	24	GC11P065806	16
MIRLET7A1	MicroRNA Let-7a-1	RNA Gene	21	GC09P094175	16
CCL2	C-C Motif Chemokine Ligand 2	Protein Coding	48	GC17P034255	15.99
TNFRSF10A	TNF Receptor Superfamily Member 10a	Protein Coding	45	GC08M023190	15.97
CD34	CD34 Molecule	Protein Coding	43	GC01M207880	15.95
MIR92A1	MicroRNA 92a-1	RNA Gene	19	GC13P091431	15.95
BMI1	BMI1 Proto-Oncogene, Polycomb Ring Finger	Protein Coding	43	GC10P022326	15.95
NANOG	Nanog Homeobox	Protein Coding	39	GC12P007787	15.94
OCIAD2	OCIA Domain Containing 2	Protein Coding	36	GC04M048887	15.93
SPARC	Secreted Protein Acidic And Cysteine Rich	Protein Coding	50	GC05M151639	15.93
ABCC2	ATP Binding Cassette Subfamily C Member 2	Protein Coding	47	GC10P099782	15.93
CD247	CD247 Molecule	Protein Coding	49	GC01M167399	15.92
CSF2	Colony Stimulating Factor 2	Protein Coding	44	GC05P132073	15.91
GNRH2	Gonadotropin Releasing Hormone 2	Protein Coding	35	GC20P003080	15.91
FGF7	Fibroblast Growth Factor 7	Protein Coding	41	GC15P049423	15.9
VTN	Vitronectin	Protein Coding	44	GC17M029955	15.88
PIK3R1	Phosphoinositide-3-Kinase Regulatory Subunit 1	Protein Coding	51	GC05P068215	15.86
SKP2	S-Phase Kinase Associated Protein 2	Protein Coding	44	GC05P036103	15.85
TIMP3	TIMP Metallopeptidase Inhibitor 3	Protein Coding	45	GC22P032800	15.85
TLR4	Toll Like Receptor 4	Protein Coding	51	GC09P117704	15.84
NRP1	Neuropilin 1	Protein Coding	47	GC10M033177	15.84
CTSD	Cathepsin D	Protein Coding	52	GC11M001752	15.84
MIR125B1	MicroRNA 125b-1	RNA Gene	21	GC11M122100	15.84
FASN	Fatty Acid Synthase	Protein Coding	49	GC17M082078	15.83
PHF13	PHD Finger Protein 13	Protein Coding	32	GC01P006613	15.82
CUL1	Cullin 1	Protein Coding	44	GC07P148697	15.82
ILK	Integrin Linked Kinase	Protein Coding	46	GC11P006581	15.82
BCL3	BCL3 Transcription Coactivator	Protein Coding	41	GC19P044747	15.81
SOD2	Superoxide Dismutase 2	Protein Coding	51	GC06M159669	15.8
TNNC1	Troponin C1, Slow Skeletal And Cardiac Type	Protein Coding	45	GC03M052452	15.76
MECOM	MDS1 And EVI1 Complex Locus	Protein Coding	47	GC03M169083	15.75
THEMIS2	Thymocyte Selection Associated Family Member 2	Protein Coding	33	GC01P027872	15.75
SERBP1	SERPINE1 MRNA Binding Protein 1	Protein Coding	35	GC01M067407	15.74
ZNF217	Zinc Finger Protein 217	Protein Coding	39	GC20M053567	15.74
CCNB1	Cyclin B1	Protein Coding	47	GC05P069167	15.73
HARS2	Histidyl-TRNA Synthetase 2, Mitochondrial	Protein Coding	43	GC05P143096	15.73
CDKN3	Cyclin Dependent Kinase Inhibitor 3	Protein Coding	42	GC14P054398	15.72
HAGLR	HOXD Antisense Growth-Associated Long Non-Coding RNA	RNA Gene	16	GC02M176173	15.71
TGFBR1	Transforming Growth Factor Beta Receptor 1	Protein Coding	52	GC09P099104	15.71
KLK5	Kallikrein Related Peptidase 5	Protein Coding	41	GC19M050943	15.7
BECN1	Beclin 1	Protein Coding	46	GC17M042810	15.69
FGF1	Fibroblast Growth Factor 1	Protein Coding	48	GC05M142555	15.68
PLG	Plasminogen	Protein Coding	48	GC06P160702	15.66
TNFRSF10D	TNF Receptor Superfamily Member 10d	Protein Coding	43	GC08M023135	15.65
HPSE	Heparanase	Protein Coding	44	GC04M083292	15.65
TGM2	Transglutaminase 2	Protein Coding	48	GC20M038127	15.64
TGFB3	Transforming Growth Factor Beta 3	Protein Coding	47	GC14M075958	15.64
CDC42	Cell Division Cycle 42	Protein Coding	51	GC01P022057	15.63
GAS5	Growth Arrest Specific 5	RNA Gene	23	GC01M173947	15.6
EPHA2	EPH Receptor A2	Protein Coding	52	GC01M016124	15.6
CTAG1B	Cancer/Testis Antigen 1B	Protein Coding	32	GC0XM154617	15.59
ENG	Endoglin	Protein Coding	46	GC09M127815	15.59
POLR3H	RNA Polymerase III Subunit H	Protein Coding	37	GC22M041525	15.59
CCN2	Cellular Communication Network Factor 2	Protein Coding	39	GC06M131948	15.58
CDKN2B-AS1	CDKN2B Antisense RNA 1	RNA Gene	21	GC09P021994	15.58
HSP90AA1	Heat Shock Protein 90 Alpha Family Class A Member 1	Protein Coding	48	GC14M102080	15.58
IGFBP5	Insulin Like Growth Factor Binding Protein 5	Protein Coding	43	GC02M216672	15.57
SLC31A1	Solute Carrier Family 31 Member 1	Protein Coding	42	GC09P113221	15.55
SOX3	SRY-Box Transcription Factor 3	Protein Coding	44	GC0XM140502	15.53
VEGFD	Vascular Endothelial Growth Factor D	Protein Coding	34	GC0XM015345	15.53
IL4	Interleukin 4	Protein Coding	46	GC05P132673	15.53
HDAC9	Histone Deacetylase 9	Protein Coding	46	GC07P018086	15.52
INHBB	Inhibin Subunit Beta B	Protein Coding	42	GC02P120349	15.5
SLPI	Secretory Leukocyte Peptidase Inhibitor	Protein Coding	39	GC20M045252	15.49
TFF1	Trefoil Factor 1	Protein Coding	44	GC21M042362	15.49
DAZL	Deleted In Azoospermia Like	Protein Coding	39	GC03M016586	15.47
EZR	Ezrin	Protein Coding	45	GC06M158765	15.46
LPAR2	Lysophosphatidic Acid Receptor 2	Protein Coding	44	GC19M019624	15.45
PDCD1	Programmed Cell Death 1	Protein Coding	48	GC02M241849	15.43
MIR22	MicroRNA 22	RNA Gene	20	GC17M001713	15.43
WNT5A	Wnt Family Member 5A	Protein Coding	49	GC03M055465	15.43
PRKCA	Protein Kinase C Alpha	Protein Coding	50	GC17P066302	15.41
CYP3A4	Cytochrome P450 Family 3 Subfamily A Member 4	Protein Coding	48	GC07M099759	15.41
GDF15	Growth Differentiation Factor 15	Protein Coding	41	GC19P023329	15.41
YBX1	Y-Box Binding Protein 1	Protein Coding	39	GC01P042682	15.4
ELAVL1	ELAV Like RNA Binding Protein 1	Protein Coding	41	GC19M007958	15.39
DUSP1	Dual Specificity Phosphatase 1	Protein Coding	47	GC05M172768	15.39
RARB	Retinoic Acid Receptor Beta	Protein Coding	50	GC03P024830	15.39
IFNA1	Interferon Alpha 1	Protein Coding	39	GC09P021494	15.38
CCBE1	Collagen And Calcium Binding EGF Domains 1	Protein Coding	40	GC18M059430	15.37
CCND3	Cyclin D3	Protein Coding	47	GC06M041934	15.37
LIF	LIF Interleukin 6 Family Cytokine	Protein Coding	43	GC22M030240	15.37
APEX1	Apurinic/Apyrimidinic Endodeoxyribonuclease 1	Protein Coding	45	GC14P020455	15.35
LOX	Lysyl Oxidase	Protein Coding	44	GC05M122063	15.35
KITLG	KIT Ligand	Protein Coding	44	GC12M088492	15.35
H2AC18	H2A Clustered Histone 18	Protein Coding	26	GC01M149961	15.35
RARA	Retinoic Acid Receptor Alpha	Protein Coding	50	GC17P040309	15.35
CHAC1	ChaC Glutathione Specific Gamma-Glutamylcyclotransferase 1	Protein Coding	37	GC15P040942	15.33
L1CAM	L1 Cell Adhesion Molecule	Protein Coding	46	GC0XM153864	15.33
HP	Haptoglobin	Protein Coding	44	GC16P072089	15.32
RAC1	Rac Family Small GTPase 1	Protein Coding	49	GC07P006380	15.31
FANCF	FA Complementation Group F	Protein Coding	42	GC11M022600	15.31
E2F3	E2F Transcription Factor 3	Protein Coding	43	GC06P020402	15.3
FAM210B	Family With Sequence Similarity 210 Member B	Protein Coding	32	GC20P056358	15.3
DNMT3A	DNA Methyltransferase 3 Alpha	Protein Coding	51	GC02M025228	15.29
LGALS1	Galectin 1	Protein Coding	43	GC22P037675	15.28
AMBP	Alpha-1-Microglobulin/Bikunin Precursor	Protein Coding	41	GC09M114060	15.28
ANXA3	Annexin A3	Protein Coding	42	GC04P078551	15.28
RSF1	Remodeling And Spacing Factor 1	Protein Coding	35	GC11M077659	15.27
APAF1	Apoptotic Peptidase Activating Factor 1	Protein Coding	47	GC12P098645	15.26
LPAR1	Lysophosphatidic Acid Receptor 1	Protein Coding	45	GC09M110873	15.26
CCNG1	Cyclin G1	Protein Coding	42	GC05P163438	15.24
SERPINB2	Serpin Family B Member 2	Protein Coding	44	GC18P063871	15.24
IL3	Interleukin 3	Protein Coding	44	GC05P132060	15.23
ZEB2	Zinc Finger E-Box Binding Homeobox 2	Protein Coding	48	GC02M144384	15.22
FOXO1	Forkhead Box O1	Protein Coding	48	GC13M040555	15.22
ATP7B	ATPase Copper Transporting Beta	Protein Coding	47	GC13M051930	15.22
TKT	Transketolase	Protein Coding	46	GC03M053224	15.21
MIR140	MicroRNA 140	RNA Gene	22	GC16P069934	15.2
SPIDR	Scaffold Protein Involved In DNA Repair	Protein Coding	32	GC08P047260	15.2
SPA17	Sperm Autoantigenic Protein 17	Protein Coding	37	GC11P124673	15.17
XPA	XPA, DNA Damage Recognition And Repair Factor	Protein Coding	45	GC09M097635	15.14
PLK1	Polo Like Kinase 1	Protein Coding	49	GC16P023888	15.13
CDC25C	Cell Division Cycle 25C	Protein Coding	48	GC05M138285	15.12
MIR29A	MicroRNA 29a	RNA Gene	21	GC07M130876	15.12
KLK3	Kallikrein Related Peptidase 3	Protein Coding	46	GC19P050854	15.11
BMPR1A	Bone Morphogenetic Protein Receptor Type 1A	Protein Coding	51	GC10P086756	15.1
RGCC	Regulator Of Cell Cycle	Protein Coding	34	GC13P041457	15.1
IL6R	Interleukin 6 Receptor	Protein Coding	48	GC01P154405	15.1
IGF2BP3	Insulin Like Growth Factor 2 MRNA Binding Protein 3	Protein Coding	41	GC07M023316	15.1
MIR148A	MicroRNA 148a	RNA Gene	18	GC07M025993	15.09
CTSL	Cathepsin L	Protein Coding	46	GC09P087725	15.08
STAT1	Signal Transducer And Activator Of Transcription 1	Protein Coding	53	GC02M190908	15.08
DCN	Decorin	Protein Coding	47	GC12M091140	15.08
JUP	Junction Plakoglobin	Protein Coding	47	GC17M041754	15.07
DCK	Deoxycytidine Kinase	Protein Coding	45	GC04P070992	15.07
TXN	Thioredoxin	Protein Coding	45	GC09M110243	15.06
PIK3CB	Phosphatidylinositol-4,5-Bisphosphate 3-Kinase Catalytic Subunit Beta	Protein Coding	47	GC03M138652	15.04
UNC93A	Unc-93 Homolog A	Protein Coding	35	GC06P167271	15.04
CD40	CD40 Molecule	Protein Coding	48	GC20P046118	15.04
IFITM1	Interferon Induced Transmembrane Protein 1	Protein Coding	41	GC11P000313	15.04
NFKBIA	NFKB Inhibitor Alpha	Protein Coding	50	GC14M035401	15.04
GRP	Gastrin Releasing Peptide	Protein Coding	41	GC18P059220	15.03
RET	Ret Proto-Oncogene	Protein Coding	53	GC10P043081	15.03
DMRT1	Doublesex And Mab-3 Related Transcription Factor 1	Protein Coding	40	GC09P000831	15.02
DNMT3B	DNA Methyltransferase 3 Beta	Protein Coding	50	GC20P032762	15.02
GRN	Granulin Precursor	Protein Coding	47	GC17P044345	15.02
CTSB	Cathepsin B	Protein Coding	51	GC08M011842	15.01
ATP11B	ATPase Phospholipid Transporting 11B (Putative)	Protein Coding	40	GC03P182793	15
MIR150	MicroRNA 150	RNA Gene	21	GC19M049500	15
NBR2	Neighbor Of BRCA1 LncRNA 2	RNA Gene	25	GC17P043125	14.99
MYCN	MYCN Proto-Oncogene, BHLH Transcription Factor	Protein Coding	46	GC02P015949	14.98
ESRRA	Estrogen Related Receptor Alpha	Protein Coding	47	GC11P064305	14.98
CCL5	C-C Motif Chemokine Ligand 5	Protein Coding	43	GC17M035871	14.98
LCN2	Lipocalin 2	Protein Coding	43	GC09P128149	14.97
PTPA	Protein Phosphatase 2 Phosphatase Activator	Protein Coding	35	GC09P129111	14.97
KLK4	Kallikrein Related Peptidase 4	Protein Coding	42	GC19M050907	14.95
ANGPT1	Angiopoietin 1	Protein Coding	45	GC08M107246	14.95
MIR532	MicroRNA 532	RNA Gene	16	GC0XP050004	14.95
SNCG	Synuclein Gamma	Protein Coding	42	GC10P086957	14.95
TNFRSF10C	TNF Receptor Superfamily Member 10c	Protein Coding	39	GC08P023102	14.94
CXCL10	C-X-C Motif Chemokine Ligand 10	Protein Coding	44	GC04M076021	14.94
IL24	Interleukin 24	Protein Coding	42	GC01P206897	14.93
CASP2	Caspase 2	Protein Coding	49	GC07P144979	14.92
PPARG	Peroxisome Proliferator Activated Receptor Gamma	Protein Coding	52	GC03P012287	14.9
PRSS8	Serine Protease 8	Protein Coding	43	GC16M031132	14.89
E2F2	E2F Transcription Factor 2	Protein Coding	42	GC01M023527	14.88
EBAG9	Estrogen Receptor Binding Site Associated Antigen 9	Protein Coding	38	GC08P109536	14.86
RCBTB1	RCC1 And BTB Domain Containing Protein 1	Protein Coding	39	GC13M049531	14.86
ROCK1	Rho Associated Coiled-Coil Containing Protein Kinase 1	Protein Coding	50	GC18M020946	14.86
EIF4EBP1	Eukaryotic Translation Initiation Factor 4E Binding Protein 1	Protein Coding	47	GC08P038007	14.85
DHFR	Dihydrofolate Reductase	Protein Coding	49	GC05M080626	14.83
SAT1	Spermidine/Spermine N1-Acetyltransferase 1	Protein Coding	45	GC0XP023784	14.81
HSPA4	Heat Shock Protein Family A (Hsp70) Member 4	Protein Coding	41	GC05P133051	14.8
RBP1	Retinol Binding Protein 1	Protein Coding	39	GC03M139517	14.78
PRLR	Prolactin Receptor	Protein Coding	48	GC05M035048	14.76
H2AX	H2A.X Variant Histone	Protein Coding	35	GC11M119097	14.76
MIR224	MicroRNA 224	RNA Gene	17	GC0XM151958	14.75
SCGB2A1	Secretoglobin Family 2A Member 1	Protein Coding	34	GC11P062227	14.75
SLC22A16	Solute Carrier Family 22 Member 16	Protein Coding	37	GC06M110424	14.75
EPHB4	EPH Receptor B4	Protein Coding	52	GC07M100803	14.74
RAD52	RAD52 Homolog, DNA Repair Protein	Protein Coding	41	GC12M000912	14.74
TMEM14A	Transmembrane Protein 14A	Protein Coding	33	GC06P052671	14.73
MIR106B	MicroRNA 106b	RNA Gene	21	GC07M100284	14.72
TP53BP1	Tumor Protein P53 Binding Protein 1	Protein Coding	44	GC15M043403	14.71
PTTG1	PTTG1 Regulator Of Sister Chromatid Separation, Securin	Protein Coding	43	GC05P160422	14.71
PTPN1	Protein Tyrosine Phosphatase Non-Receptor Type 1	Protein Coding	51	GC20P050510	14.71
MEG3	Maternally Expressed 3	RNA Gene	29	GC14P104771	14.7
ATP7A	ATPase Copper Transporting Alpha	Protein Coding	45	GC0XP077927	14.69
PMM2	Phosphomannomutase 2	Protein Coding	47	GC16P008788	14.69
SRA1	Steroid Receptor RNA Activator 1	Protein Coding	37	GC05M140537	14.68
SPINT1	Serine Peptidase Inhibitor, Kunitz Type 1	Protein Coding	40	GC15P040844	14.67
RAN	RAN, Member RAS Oncogene Family	Protein Coding	45	GC12P130871	14.67
IL17A	Interleukin 17A	Protein Coding	42	GC06P052186	14.66
HSPA1A	Heat Shock Protein Family A (Hsp70) Member 1A	Protein Coding	43	GC06P047326	14.66
CDC25A	Cell Division Cycle 25A	Protein Coding	47	GC03M048173	14.65
HPN	Hepsin	Protein Coding	43	GC19P035040	14.64
TUG1	Taurine Up-Regulated 1	RNA Gene	22	GC22P030969	14.64
PALLD	Palladin, Cytoskeletal Associated Protein	Protein Coding	42	GC04P168497	14.64
NEAT1	Nuclear Paraspeckle Assembly Transcript 1	RNA Gene	23	GC11P065794	14.64
MIR130A	MicroRNA 130a	RNA Gene	20	GC11P057641	14.63
MIR193A	MicroRNA 193a	RNA Gene	18	GC17P031559	14.63
MIR100	MicroRNA 100	RNA Gene	21	GC11M122152	14.63
FOXP3	Forkhead Box P3	Protein Coding	46	GC0XM049250	14.62
UCA1	Urothelial Cancer Associated 1	RNA Gene	24	GC19P015828	14.62
PXDN	Peroxidasin	Protein Coding	41	GC02M001635	14.62
MIR196A1	MicroRNA 196a-1	RNA Gene	19	GC17M048632	14.61
CXADR	CXADR Ig-Like Cell Adhesion Molecule	Protein Coding	43	GC21P017512	14.61
MIR152	MicroRNA 152	RNA Gene	20	GC17M048037	14.6
HMGB1	High Mobility Group Box 1	Protein Coding	44	GC13M030456	14.6
DNM3OS	DNM3 Opposite Strand/Antisense RNA	RNA Gene	17	GC01M172236	14.58
RNASET2	Ribonuclease T2	Protein Coding	44	GC06M166929	14.58
LGALS3BP	Galectin 3 Binding Protein	Protein Coding	41	GC17M078971	14.57
HLA-A	Major Histocompatibility Complex, Class I, A	Protein Coding	46	GC06P047265	14.56
SHC1	SHC Adaptor Protein 1	Protein Coding	45	GC01M154962	14.55
MIR506	MicroRNA 506	RNA Gene	15	GC0XM147230	14.55
CCAT1	Colon Cancer Associated Transcript 1	RNA Gene	14	GC08M127207	14.53
GZMB	Granzyme B	Protein Coding	45	GC14M024630	14.52
MIF	Macrophage Migration Inhibitory Factor	Protein Coding	49	GC22P023894	14.52
MIRLET7B	MicroRNA Let-7b	RNA Gene	20	GC22P046119	14.52
CDKN2C	Cyclin Dependent Kinase Inhibitor 2C	Protein Coding	45	GC01P050960	14.52
MIR424	MicroRNA 424	RNA Gene	17	GC0XM134627	14.51
MIR183	MicroRNA 183	RNA Gene	18	GC07M129789	14.5
TG	Thyroglobulin	Protein Coding	42	GC08P132866	14.5
TSG101	Tumor Susceptibility 101	Protein Coding	43	GC11M018468	14.48
MIR29B1	MicroRNA 29b-1	RNA Gene	21	GC07M130877	14.46
FAP	Fibroblast Activation Protein Alpha	Protein Coding	42	GC02M162170	14.46
EIF4E	Eukaryotic Translation Initiation Factor 4E	Protein Coding	50	GC04M098871	14.42
MIR25	MicroRNA 25	RNA Gene	20	GC07M100093	14.42
MAGEA1	MAGE Family Member A1	Protein Coding	37	GC0XP153179	14.42
ANPEP	Alanyl Aminopeptidase, Membrane	Protein Coding	48	GC15M089784	14.41
IL7	Interleukin 7	Protein Coding	42	GC08M078689	14.4
PXN	Paxillin	Protein Coding	45	GC12M120210	14.39
PLAGL1	PLAG1 Like Zinc Finger 1	Protein Coding	43	GC06M143940	14.38
RNF43	Ring Finger Protein 43	Protein Coding	37	GC17M058352	14.37
MIR134	MicroRNA 134	RNA Gene	18	GC14P104777	14.36
NPM1	Nucleophosmin 1	Protein Coding	50	GC05P171387	14.35
KLRK1	Killer Cell Lectin Like Receptor K1	Protein Coding	40	GC12M013865	14.33
FOXP2	Forkhead Box P2	Protein Coding	43	GC07P114086	14.32
MIR130B	MicroRNA 130b	RNA Gene	17	GC22P024903	14.31
CCAT2	Colon Cancer Associated Transcript 2	RNA Gene	13	GC08P127400	14.3
MIR99A	MicroRNA 99a	RNA Gene	21	GC21P016539	14.3
E2F4	E2F Transcription Factor 4	Protein Coding	45	GC16P067192	14.29
MIR338	MicroRNA 338	RNA Gene	17	GC17M081126	14.28
FAM215A	Family With Sequence Similarity 215 Member A	RNA Gene	22	GC17P043917	14.28
TFRC	Transferrin Receptor	Protein Coding	48	GC03M196027	14.26
RHOD	Ras Homolog Family Member D	Protein Coding	39	GC11P067057	14.24
HSPB2	Heat Shock Protein Family B (Small) Member 2	Protein Coding	40	GC11P111913	14.24
MIR195	MicroRNA 195	RNA Gene	19	GC17M007018	14.23
SPRY4-IT1	SPRY4 Intronic Transcript 1	RNA Gene	14	GC05M142318	14.21
MIR7-1	MicroRNA 7-1	RNA Gene	18	GC09M084057	14.19
MLH3	MutL Homolog 3	Protein Coding	42	GC14M075013	14.18
CD46	CD46 Molecule	Protein Coding	46	GC01P207752	14.18
MIR142	MicroRNA 142	RNA Gene	20	GC17M058331	14.18
WRN	WRN RecQ Like Helicase	Protein Coding	45	GC08P031033	14.17
ZP2	Zona Pellucida Glycoprotein 2	Protein Coding	37	GC16M021198	14.17
GUSB	Glucuronidase Beta	Protein Coding	47	GC07M065960	14.17
LYVE1	Lymphatic Vessel Endothelial Hyaluronan Receptor 1	Protein Coding	41	GC11M010653	14.15
MIR149	MicroRNA 149	RNA Gene	21	GC02P240456	14.13
ERLNC1	Estrogen Receptor Responsive LncRNA 1	RNA Gene	10	GC01P204141	14.11
PTPN13	Protein Tyrosine Phosphatase Non-Receptor Type 13	Protein Coding	43	GC04P086594	14.09
RECK	Reversion Inducing Cysteine Rich Protein With Kazal Motifs	Protein Coding	40	GC09P036036	14.09
MIR381	MicroRNA 381	RNA Gene	17	GC14P104797	14.09
PRSS21	Serine Protease 21	Protein Coding	40	GC16P004235	14.04
ASNS	Asparagine Synthetase (Glutamine-Hydrolyzing)	Protein Coding	46	GC07M097854	14.03
MIR498	MicroRNA 498	RNA Gene	16	GC19P054606	14.02
ARAF	A-Raf Proto-Oncogene, Serine/Threonine Kinase	Protein Coding	45	GC0XP047562	14
MIR494	MicroRNA 494	RNA Gene	17	GC14P104814	14
CCR6	C-C Motif Chemokine Receptor 6	Protein Coding	44	GC06P167111	13.99
MIR542	MicroRNA 542	RNA Gene	17	GC0XM134630	13.97
XIST	X Inactive Specific Transcript	RNA Gene	24	GC0XM073820	13.97
MIR186	MicroRNA 186	RNA Gene	18	GC01M071067	13.9
MNX1-AS1	MNX1 Antisense RNA 1 (Head To Head)	RNA Gene	16	GC07P157010	13.87
MIR302C	MicroRNA 302c	RNA Gene	19	GC04M112680	13.85
MIR509-1	MicroRNA 509-1	RNA Gene	15	GC0XM147260	13.83
HOXA11-AS	HOXA11 Antisense RNA	RNA Gene	20	GC07P027184	13.82
AFAP1-AS1	AFAP1 Antisense RNA 1	RNA Gene	17	GC04P007756	13.8
LINC01088	Long Intergenic Non-Protein Coding RNA 1088	RNA Gene	16	GC04P078971	13.74
CRNDE	Colorectal Neoplasia Differentially Expressed	Protein Coding	21	GC16M054845	13.73
DDX4	DEAD-Box Helicase 4	Protein Coding	40	GC05P055738	13.73
SNHG20	Small Nucleolar RNA Host Gene 20	RNA Gene	17	GC17P077087	13.72
MIR508	MicroRNA 508	RNA Gene	15	GC0XM147236	13.7
AKAP3	A-Kinase Anchoring Protein 3	Protein Coding	36	GC12M004614	13.7
PPP2R1A	Protein Phosphatase 2 Scaffold Subunit Aalpha	Protein Coding	47	GC19P052189	13.7
SHOX	Short Stature Homeobox	Protein Coding	38	GC0XP000624	13.66
LINC-ROR	Long Intergenic Non-Protein Coding RNA, Regulator Of Reprogramming	RNA Gene	16	GC18M057054	13.65
ZNF300P1	Zinc Finger Protein 300 Pseudogene 1	Pseudogene	14	GC05M150930	13.61
SNHG16	Small Nucleolar RNA Host Gene 16	RNA Gene	17	GC17P076559	13.59
MSH4	MutS Homolog 4	Protein Coding	37	GC01P075796	13.58
LINC00472	Long Intergenic Non-Protein Coding RNA 472	RNA Gene	22	GC06M071344	13.56
DACH2	Dachshund Family Transcription Factor 2	Protein Coding	36	GC0XP086148	13.56
ZFAS1	ZNFX1 Antisense RNA 1	RNA Gene	18	GC20P049276	13.53
NRAS	NRAS Proto-Oncogene, GTPase	Protein Coding	50	GC01M114704	13.52
MIR211	MicroRNA 211	RNA Gene	18	GC15M031065	13.52
HOXA11	Homeobox A11	Protein Coding	41	GC07M027259	13.5
ASAP1-IT1	ASAP1 Intronic Transcript 1	RNA Gene	15	GC08M130295	13.46
SUFU	SUFU Negative Regulator Of Hedgehog Signaling	Protein Coding	43	GC10P102503	13.46
MIR485	MicroRNA 485	RNA Gene	17	GC14P104810	13.45
CNC2	Carney Complex Type 2, Multiple Neoplasia And Lentiginosis	Genetic Locus	4	GC02U990267	13.45
MIR22HG	MIR22 Host Gene	RNA Gene	27	GC17M001714	13.44
MIR26B	MicroRNA 26b	RNA Gene	21	GC02P218402	13.44
MIR572	MicroRNA 572	RNA Gene	14	GC04P013477	13.44
IGFBP1	Insulin Like Growth Factor Binding Protein 1	Protein Coding	43	GC07P046552	13.43
CARS2	Cysteinyl-TRNA Synthetase 2, Mitochondrial	Protein Coding	41	GC13M110641	13.43
IGSF9B	Immunoglobulin Superfamily Member 9B	Protein Coding	32	GC11M133915	13.42
MIRLET7E	MicroRNA Let-7e	RNA Gene	20	GC19P051718	13.41
MIR374A	MicroRNA 374a	RNA Gene	16	GC0XM074296	13.38
LHB	Luteinizing Hormone Subunit Beta	Protein Coding	38	GC19M049015	13.37
MIR184	MicroRNA 184	RNA Gene	23	GC15P079209	13.37
LINC00092	Long Intergenic Non-Protein Coding RNA 92	RNA Gene	16	GC09M096019	13.35
BACE1-AS	BACE1 Antisense RNA	RNA Gene	13	GC11P117304	13.35
LINC00623	Long Intergenic Non-Protein Coding RNA 623	RNA Gene	13	GC01P120921	13.32
MIR637	MicroRNA 637	RNA Gene	16	GC19M003961	13.29
LINC00515	Long Intergenic Non-Protein Coding RNA 515	RNA Gene	15	GC21M025582	13.29
TPO	Thyroid Peroxidase	Protein Coding	48	GC02P001374	13.26
ICOSLG	Inducible T Cell Costimulator Ligand	Protein Coding	39	GC21M044222	13.22
LINC01772	Long Intergenic Non-Protein Coding RNA 1772	RNA Gene	10	GC01P016478	13.15
MEN1	Menin 1	Protein Coding	46	GC11M064803	13.14
LHX8	LIM Homeobox 8	Protein Coding	37	GC01P075128	13.14
REC8	REC8 Meiotic Recombination Protein	Protein Coding	37	GC14P024171	13.08
PGRMC1	Progesterone Receptor Membrane Component 1	Protein Coding	44	GC0XP119236	13.07
EPPIN	Epididymal Peptidase Inhibitor	Protein Coding	35	GC20M045541	13.04
HSD3B2	Hydroxy-Delta-5-Steroid Dehydrogenase, 3 Beta- And Steroid Delta-Isomerase 2	Protein Coding	46	GC01P119414	13
BOK	BCL2 Family Apoptosis Regulator BOK	Protein Coding	40	GC02P241558	12.96
PRKAR1A	Protein Kinase CAMP-Dependent Type I Regulatory Subunit Alpha	Protein Coding	51	GC17P068414	12.85
SPO11	SPO11 Initiator Of Meiotic Double Stranded Breaks	Protein Coding	37	GC20P057329	12.8
PTCH2	Patched 2	Protein Coding	44	GC01M044819	12.77
MIR29C	MicroRNA 29c	RNA Gene	18	GC01M207802	12.76
CGB5	Chorionic Gonadotropin Subunit Beta 5	Protein Coding	32	GC19P049043	12.71
MIAT	Myocardial Infarction Associated Transcript	RNA Gene	23	GC22P026646	12.66
SOX2-OT	SOX2 Overlapping Transcript	RNA Gene	21	GC03P180989	12.66
BCYRN1	Brain Cytoplasmic RNA 1	RNA Gene	18	GC02P047331	12.66
MIR605	MicroRNA 605	RNA Gene	16	GC10P051299	12.66
MIR663A	MicroRNA 663a	RNA Gene	15	GC20M026189	12.66
NBAT1	Neuroblastoma Associated Transcript 1	RNA Gene	15	GC06M022137	12.66
NNT-AS1	NNT Antisense RNA 1	RNA Gene	14	GC05M043603	12.66
LOC100128310	Uncharacterized LOC100128310	RNA Gene	9	GC20M061718	12.66
IDH1	Isocitrate Dehydrogenase (NADP(+)) 1	Protein Coding	52	GC02M208236	12.65
SOHLH2	Spermatogenesis And Oogenesis Specific Basic Helix-Loop-Helix 2	Protein Coding	31	GC13M036169	12.63
TNFRSF19	TNF Receptor Superfamily Member 19	Protein Coding	39	GC13P023570	12.57
H1-3	H1.3 Linker Histone, Cluster Member	Protein Coding	30	GC06M027296	12.57
MIR190A	MicroRNA 190a	RNA Gene	19	GC15P073129	12.57
MIR346	MicroRNA 346	RNA Gene	18	GC10M086264	12.57
MIR331	MicroRNA 331	RNA Gene	18	GC12P095308	12.57
MIR551A	MicroRNA 551a	RNA Gene	18	GC01M003560	12.57
MIR296	MicroRNA 296	RNA Gene	17	GC20M058817	12.57
MIR487B	MicroRNA 487b	RNA Gene	17	GC14P104812	12.57
MIR608	MicroRNA 608	RNA Gene	17	GC10P100974	12.57
MIR361	MicroRNA 361	RNA Gene	16	GC0XM085903	12.57
MIR422A	MicroRNA 422a	RNA Gene	16	GC15M063870	12.57
MIR515-1	MicroRNA 515-1	RNA Gene	16	GC19P053679	12.57
MIR518B	MicroRNA 518b	RNA Gene	16	GC19P054620	12.57
MIR657	MicroRNA 657	RNA Gene	16	GC17M081125	12.57
MIR627	MicroRNA 627	RNA Gene	16	GC15M042199	12.57
MIR147A	MicroRNA 147a	RNA Gene	15	GC09M120244	12.57
LUCAT1	Lung Cancer Associated Transcript 1	RNA Gene	15	GC05M091054	12.57
ENTPD3-AS1	ENTPD3 Antisense RNA 1	RNA Gene	15	GC03M040313	12.57
MIR662	MicroRNA 662	RNA Gene	15	GC16P001410	12.57
MIR648	MicroRNA 648	RNA Gene	15	GC22M017980	12.57
GACAT3	Gastric Cancer Associated Transcript 3	RNA Gene	14	GC02P016050	12.57
MIR611	MicroRNA 611	RNA Gene	14	GC11M061792	12.57
MIR635	MicroRNA 635	RNA Gene	14	GC17M068424	12.57
SPAAR	Small Regulatory Polypeptide Of Amino Acid Response	Protein Coding	14	GC09P035914	12.57
MIR622	MicroRNA 622	RNA Gene	13	GC13P090231	12.57
PTPRD-AS1	PTPRD Antisense RNA 1	RNA Gene	13	GC09P008860	12.57
DCST1-AS1	DCST1 Antisense RNA 1	RNA Gene	12	GC01M155046	12.57
DUXAP10	Double Homeobox A Pseudogene 10	Pseudogene	10	GC14M019294	12.57
MIR583HG	MIR583 Host Gene	RNA Gene	9	GC05P096051	12.57
LOC110485084	BRCA1 Intronic Recombination Region	Biological Region	1	GC17P044047	12.47
SYCP3	Synaptonemal Complex Protein 3	Protein Coding	41	GC12M101728	12.46
SMARCB1	SWI/SNF Related, Matrix Associated, Actin Dependent Regulator Of Chromatin, Subfamily B, Member 1	Protein Coding	45	GC22P023786	12.46
NANOS3	Nanos C2HC-Type Zinc Finger 3	Protein Coding	36	GC19P013862	12.18
PRKCD	Protein Kinase C Delta	Protein Coding	53	GC03P053156	12.17
GALK1	Galactokinase 1	Protein Coding	48	GC17M075751	12.15
GH1	Growth Hormone 1	Protein Coding	44	GC17M063917	12.12
CEP290	Centrosomal Protein 290	Protein Coding	40	GC12M088049	12.1
ENO1	Enolase 1	Protein Coding	47	GC01M008861	12.04
SYP	Synaptophysin	Protein Coding	43	GC0XM049187	11.95
GPR3	G Protein-Coupled Receptor 3	Protein Coding	38	GC01P027393	11.87
EPRS1	Glutamyl-Prolyl-TRNA Synthetase 1	Protein Coding	36	GC01M219969	11.85
ADAMTS19	ADAM Metallopeptidase With Thrombospondin Type 1 Motif 19	Protein Coding	36	GC05P129460	11.82
NLRP5	NLR Family Pyrin Domain Containing 5	Protein Coding	37	GC19P056000	11.62
USP8	Ubiquitin Specific Peptidase 8	Protein Coding	48	GC15P050424	11.6
CDX2	Caudal Type Homeobox 2	Protein Coding	43	GC13M027962	11.49
CPEB1	Cytoplasmic Polyadenylation Element Binding Protein 1	Protein Coding	40	GC15M082543	11.47
FGFR3	Fibroblast Growth Factor Receptor 3	Protein Coding	55	GC04P001795	11.45
AFF2	AF4/FMR2 Family Member 2	Protein Coding	41	GC0XP148500	11.44
MIR193B	MicroRNA 193b	RNA Gene	20	GC16P014307	11.41
EIF4ENIF1	Eukaryotic Translation Initiation Factor 4E Nuclear Import Factor 1	Protein Coding	37	GC22M031436	11.38
KLLN	Killin, P53 Regulated DNA Replication Inhibitor	Protein Coding	29	GC10M087860	11.34
XPNPEP2	X-Prolyl Aminopeptidase 2	Protein Coding	44	GC0XP129738	11.33
FH	Fumarate Hydratase	Protein Coding	45	GC01M241499	11.19
IDH2	Isocitrate Dehydrogenase (NADP(+)) 2	Protein Coding	52	GC15M090083	11.11
MIR144	MicroRNA 144	RNA Gene	16	GC17M029965	11.02
KEAP1	Kelch Like ECH Associated Protein 1	Protein Coding	48	GC19M010486	10.97
SMC1B	Structural Maintenance Of Chromosomes 1B	Protein Coding	37	GC22M045344	10.89
STRA8	Stimulated By Retinoic Acid 8	Protein Coding	35	GC07P135231	10.89
CASP10	Caspase 10	Protein Coding	48	GC02P201182	10.86
ADIPOQ	Adiponectin, C1Q And Collagen Domain Containing	Protein Coding	45	GC03P186842	10.86
RSPO1	R-Spondin 1	Protein Coding	44	GC01M037612	10.8
RAD21L1	RAD21 Cohesin Complex Component Like 1	Protein Coding	29	GC20P001226	10.8
CYP21A2	Cytochrome P450 Family 21 Subfamily A Member 2	Protein Coding	45	GC06P047333	10.79
SYCP1	Synaptonemal Complex Protein 1	Protein Coding	36	GC01P114854	10.73
CFAP47	Cilia And Flagella Associated Protein 47	Protein Coding	25	GC0XP035919	10.68
DCAF17	DDB1 And CUL4 Associated Factor 17	Protein Coding	36	GC02P171434	10.68
PTHLH	Parathyroid Hormone Like Hormone	Protein Coding	45	GC12M027959	10.67
CEP164	Centrosomal Protein 164	Protein Coding	40	GC11P117314	10.67
ZNF711	Zinc Finger Protein 711	Protein Coding	39	GC0XP085243	10.58
FAM122C	Family With Sequence Similarity 122C	Protein Coding	29	GC0XP134796	10.57
FRAXA	Fragile Site, Folic Acid Type, Rare, Fra(X)(Q27.3) A (Macroorchidism, Mental Retardation)	Biological Region	6	GC0XP147914	10.5
REN	Renin	Protein Coding	48	GC01M204154	10.45
CBL	Cbl Proto-Oncogene	Protein Coding	50	GC11P119206	10.24
SDCCAG8	SHH Signaling And Ciliogenesis Regulator SDCCAG8	Protein Coding	41	GC01P243255	10.17
CRP	C-Reactive Protein	Protein Coding	46	GC01M159716	10.16
ZAR1L	Zygote Arrest 1 Like	Protein Coding	27	GC13M033514	9.97
MTHFR	Methylenetetrahydrofolate Reductase	Protein Coding	47	GC01M011785	9.92
UPK3A	Uroplakin 3A	Protein Coding	37	GC22P045284	9.92
DES	Desmin	Protein Coding	48	GC02P219418	9.86
PCOS1	Polycystic Ovary Syndrome 1	Genetic Locus	3	GC19U901631	9.86
ENO2	Enolase 2	Protein Coding	47	GC12P006913	9.8
HSD3B1	Hydroxy-Delta-5-Steroid Dehydrogenase, 3 Beta- And Steroid Delta-Isomerase 1	Protein Coding	43	GC01P119507	9.78
RASGRP1	RAS Guanyl Releasing Protein 1	Protein Coding	46	GC15M038488	9.68
MCM3AP	Minichromosome Maintenance Complex Component 3 Associated Protein	Protein Coding	40	GC21M046235	9.68
THOC6	THO Complex 6	Protein Coding	38	GC16P003024	9.68
RFC2	Replication Factor C Subunit 2	Protein Coding	44	GC07M074231	9.66
PRKACG	Protein Kinase CAMP-Activated Catalytic Subunit Gamma	Protein Coding	47	GC09M069013	9.61
MIR20A	MicroRNA 20a	RNA Gene	19	GC13P091434	9.49
NKX2-1	NK2 Homeobox 1	Protein Coding	46	GC14M036516	9.49
MUC2	Mucin 2, Oligomeric Mucus/Gel-Forming	Protein Coding	38	GC11P001074	9.25
DMPK	DM1 Protein Kinase	Protein Coding	48	GC19M045769	9.23
PRKACA	Protein Kinase CAMP-Activated Catalytic Subunit Alpha	Protein Coding	51	GC19M014092	9.2
NGF	Nerve Growth Factor	Protein Coding	50	GC01M115285	9.15
TUBB3	Tubulin Beta 3 Class III	Protein Coding	49	GC16P089919	9.13
NPHP1	Nephrocystin 1	Protein Coding	43	GC02M110122	9.1
NTHL1	Nth Like DNA Glycosylase 1	Protein Coding	44	GC16M002192	8.99
OFD1	OFD1 Centriole And Centriolar Satellite Protein	Protein Coding	41	GC0XP013734	8.99
DMRT3	Doublesex And Mab-3 Related Transcription Factor 3	Protein Coding	33	GC09P000976	8.98
POR	Cytochrome P450 Oxidoreductase	Protein Coding	48	GC07P075899	8.78
MUC6	Mucin 6, Oligomeric Mucus/Gel-Forming	Protein Coding	37	GC11M001002	8.76
B2M	Beta-2-Microglobulin	Protein Coding	48	GC15P044711	8.72
CEBPB	CCAAT Enhancer Binding Protein Beta	Protein Coding	43	GC20P050190	8.66
ZFPM2	Zinc Finger Protein, FOG Family Member 2	Protein Coding	41	GC08P104590	8.63
CDH23	Cadherin Related 23	Protein Coding	41	GC10P071396	8.59
C11orf65	Chromosome 11 Open Reading Frame 65	Protein Coding	30	GC11M108308	8.55
EWSR1	EWS RNA Binding Protein 1	Protein Coding	43	GC22P029269	8.53
IGFBP4	Insulin Like Growth Factor Binding Protein 4	Protein Coding	43	GC17P040443	8.47
PAPPA	Pappalysin 1	Protein Coding	41	GC09P116179	8.44
BGLAP	Bone Gamma-Carboxyglutamate Protein	Protein Coding	40	GC01P156242	8.43
KRT19	Keratin 19	Protein Coding	45	GC17M041523	8.43
PCNA	Proliferating Cell Nuclear Antigen	Protein Coding	51	GC20M005114	8.41
HSD3BP4	Hydroxy-Delta-5-Steroid Dehydrogenase, 3 Beta, Pseudogene 4	Pseudogene	12	GC01P119563	8.4
XRCC3	X-Ray Repair Cross Complementing 3	Protein Coding	41	GC14M103697	8.4
NAMPT	Nicotinamide Phosphoribosyltransferase	Protein Coding	48	GC07M106248	8.4
B4GALNT1	Beta-1,4-N-Acetyl-Galactosaminyltransferase 1	Protein Coding	44	GC12M057623	8.39
INVS	Inversin	Protein Coding	44	GC09P100099	8.39
RIN2	Ras And Rab Interactor 2	Protein Coding	41	GC20P019759	8.39
IQCB1	IQ Motif Containing B1	Protein Coding	41	GC03M121769	8.39
NPHP4	Nephrocystin 4	Protein Coding	40	GC01M005863	8.39
NPHP3	Nephrocystin 3	Protein Coding	39	GC03M132683	8.39
TRAF3IP1	TRAF3 Interacting Protein 1	Protein Coding	38	GC02P238320	8.39
WDR19	WD Repeat Domain 19	Protein Coding	38	GC04P039184	8.39
TTI2	TELO2 Interacting Protein 2	Protein Coding	36	GC08M033473	8.39
FAN1	FANCD2 And FANCI Associated Nuclease 1	Protein Coding	37	GC15P031408	8.37
MME	Membrane Metalloendopeptidase	Protein Coding	50	GC03P155024	8.34
GHRH	Growth Hormone Releasing Hormone	Protein Coding	40	GC20M037251	8.34
ACTB	Actin Beta	Protein Coding	49	GC07M005527	8.34
RINT1	RAD50 Interactor 1	Protein Coding	36	GC07P105532	8.34
F7	Coagulation Factor VII	Protein Coding	47	GC13P113105	8.29
GHR	Growth Hormone Receptor	Protein Coding	47	GC05P042429	8.24
NAPSA	Napsin A Aspartic Peptidase	Protein Coding	41	GC19M050385	8.22
SALL4	Spalt Like Transcription Factor 4	Protein Coding	43	GC20M051784	8.09
PGBD3	PiggyBac Transposable Element Derived 3	Protein Coding	27	GC10M049517	8.07
PDGFD	Platelet Derived Growth Factor D	Protein Coding	44	GC11M103907	8
BMPR1B	Bone Morphogenetic Protein Receptor Type 1B	Protein Coding	50	GC04P094757	7.95
VDR	Vitamin D Receptor	Protein Coding	51	GC12M047841	7.93
GLI1	GLI Family Zinc Finger 1	Protein Coding	47	GC12P057460	7.89
SERPINB11	Serpin Family B Member 11	Protein Coding	32	GC18P063647	7.89
CEACAM3	CEA Cell Adhesion Molecule 3	Protein Coding	40	GC19P041796	7.88
ZFHX4	Zinc Finger Homeobox 4	Protein Coding	37	GC08P076681	7.85
MIR23A	MicroRNA 23a	RNA Gene	20	GC19M014011	7.82
NRIP1	Nuclear Receptor Interacting Protein 1	Protein Coding	43	GC21M014961	7.82
MYH8	Myosin Heavy Chain 8	Protein Coding	40	GC17M010390	7.82
CLDN14	Claudin 14	Protein Coding	44	GC21M036460	7.76
SHH	Sonic Hedgehog Signaling Molecule	Protein Coding	50	GC07M155799	7.74
BSCL2	BSCL2 Lipid Droplet Biogenesis Associated, Seipin	Protein Coding	42	GC11M063438	7.71
GHRL	Ghrelin And Obestatin Prepropeptide	Protein Coding	43	GC03M010285	7.71
LNCOC1	LncRNA Associated With Ovarian Cancer 1	RNA Gene	10	GC08M142688	7.7
TH2LCRR	T Helper Type 2 Locus Control Region Associated RNA	RNA Gene	10	GC05M132631	7.68
S100B	S100 Calcium Binding Protein B	Protein Coding	45	GC21M047431	7.68
LOC111589216	BRCA1 Intron 2 Regulatory Region	Biological Region	1	GC17P044051	7.68
LOC112163653	Sharpr-MPRA Regulatory Region 1962	Biological Region	1	GC13P032381	7.68
DHH	Desert Hedgehog Signaling Molecule	Protein Coding	41	GC12M049094	7.62
FANCG	FA Complementation Group G	Protein Coding	43	GC09M035073	7.6
GSTM1	Glutathione S-Transferase Mu 1	Protein Coding	41	GC01P109687	7.58
SDHB	Succinate Dehydrogenase Complex Iron Sulfur Subunit B	Protein Coding	47	GC01M017020	7.57
F5	Coagulation Factor V	Protein Coding	45	GC01M169511	7.52
THBD	Thrombomodulin	Protein Coding	44	GC20M023026	7.48
MIR96	MicroRNA 96	RNA Gene	20	GC07M129774	7.48
KRT8	Keratin 8	Protein Coding	47	GC12M052897	7.46
FLI1	Fli-1 Proto-Oncogene, ETS Transcription Factor	Protein Coding	49	GC11P128686	7.39
MIR10A	MicroRNA 10a	RNA Gene	21	GC17M048579	7.37
CGB3	Chorionic Gonadotropin Subunit Beta 3	Protein Coding	31	GC19M049024	7.35
PTH1R	Parathyroid Hormone 1 Receptor	Protein Coding	50	GC03P046877	7.33
MKI67	Marker Of Proliferation Ki-67	Protein Coding	44	GC10M128096	7.33
NCOA4	Nuclear Receptor Coactivator 4	Protein Coding	39	GC10M046005	7.33
LGALS3	Galectin 3	Protein Coding	44	GC14P055124	7.27
VAMP7	Vesicle Associated Membrane Protein 7	Protein Coding	42	GC0XP155881	7.27
CHGA	Chromogranin A	Protein Coding	42	GC14P092923	7.25
FGF8	Fibroblast Growth Factor 8	Protein Coding	47	GC10M101770	7.21
DENND1A	DENN Domain Containing 1A	Protein Coding	39	GC09M123379	7.19
POLE	DNA Polymerase Epsilon, Catalytic Subunit	Protein Coding	48	GC12M132624	7.14
FOXE1	Forkhead Box E1	Protein Coding	42	GC09P097853	7.11
CYP11B1	Cytochrome P450 Family 11 Subfamily B Member 1	Protein Coding	48	GC08M142872	7.1
ANXA2	Annexin A2	Protein Coding	48	GC15M060347	7.09
SNCA	Synuclein Alpha	Protein Coding	50	GC04M089724	7.08
MLANA	Melan-A	Protein Coding	39	GC09P005846	7.07
FNDC8	Fibronectin Type III Domain Containing 8	Protein Coding	31	GC17P035122	7.05
USP9X	Ubiquitin Specific Peptidase 9 X-Linked	Protein Coding	47	GC0XP041085	7.05
SST	Somatostatin	Protein Coding	42	GC03M187668	7.05
MIR181A1	MicroRNA 181a-1	RNA Gene	18	GC01M198860	7.01
PTH	Parathyroid Hormone	Protein Coding	47	GC11M013492	7
AGPAT2	1-Acylglycerol-3-Phosphate O-Acyltransferase 2	Protein Coding	45	GC09M136673	6.97
SRD5A1	Steroid 5 Alpha-Reductase 1	Protein Coding	44	GC05P006633	6.96
MIR15A	MicroRNA 15a	RNA Gene	16	GC13M050049	6.95
ESS2	Ess-2 Splicing Factor Homolog	Protein Coding	28	GC22M019130	6.92
POSTN	Periostin	Protein Coding	43	GC13M037562	6.91
PLIN1	Perilipin 1	Protein Coding	44	GC15M089664	6.91
YOD1	YOD1 Deubiquitinase	Protein Coding	37	GC01M207044	6.9
ACTC1	Actin Alpha Cardiac Muscle 1	Protein Coding	42	GC15M034788	6.88
NCAM1	Neural Cell Adhesion Molecule 1	Protein Coding	45	GC11P112961	6.86
MIR23B	MicroRNA 23b	RNA Gene	20	GC09P095085	6.85
OSR2	Odd-Skipped Related Transciption Factor 2	Protein Coding	37	GC08P098938	6.76
ZNF304	Zinc Finger Protein 304	Protein Coding	32	GC19P057351	6.73
HYAL3	Hyaluronidase 3	Protein Coding	37	GC03M050294	6.72
ADAMTS9-AS1	ADAMTS9 Antisense RNA 1	RNA Gene	13	GC03P064549	6.7
ALOX5	Arachidonate 5-Lipoxygenase	Protein Coding	48	GC10P045374	6.69
COMT	Catechol-O-Methyltransferase	Protein Coding	51	GC22P019941	6.62
USF3	Upstream Transcription Factor Family Member 3	Protein Coding	26	GC03M113649	6.61
SLC22A18	Solute Carrier Family 22 Member 18	Protein Coding	42	GC11P002899	6.61
EIF2S2	Eukaryotic Translation Initiation Factor 2 Subunit Beta	Protein Coding	40	GC20M034088	6.6
MIR24-1	MicroRNA 24-1	RNA Gene	18	GC09P095086	6.57
CEACAM7	CEA Cell Adhesion Molecule 7	Protein Coding	37	GC19M041673	6.57
KDM4C	Lysine Demethylase 4C	Protein Coding	40	GC09P006720	6.55
GGT1	Gamma-Glutamyltransferase 1	Protein Coding	46	GC22P024927	6.54
GNAI2	G Protein Subunit Alpha I2	Protein Coding	47	GC03P050226	6.54
ALK	ALK Receptor Tyrosine Kinase	Protein Coding	51	GC02M029156	6.54
SERPINA7	Serpin Family A Member 7	Protein Coding	39	GC0XM106032	6.51
MIR132	MicroRNA 132	RNA Gene	21	GC17M002049	6.49
WNT10A	Wnt Family Member 10A	Protein Coding	45	GC02P218880	6.45
C11orf95	Chromosome 11 Open Reading Frame 95	Protein Coding	29	GC11M063760	6.45
TSPY1	Testis Specific Protein Y-Linked 1	Protein Coding	33	GC0YP009469	6.4
RUNX3	RUNX Family Transcription Factor 3	Protein Coding	43	GC01M024899	6.36
RETN	Resistin	Protein Coding	43	GC19P007669	6.36
MLX	MAX Dimerization Protein MLX	Protein Coding	43	GC17P042567	6.35
RIPK1	Receptor Interacting Serine/Threonine Kinase 1	Protein Coding	49	GC06P003064	6.33
PROKR2	Prokineticin Receptor 2	Protein Coding	41	GC20M005303	6.33
LIMK1	LIM Domain Kinase 1	Protein Coding	49	GC07P074082	6.31
MUTYH	MutY DNA Glycosylase	Protein Coding	44	GC01M045329	6.3
GAST	Gastrin	Protein Coding	40	GC17P041712	6.29
FOLR3	Folate Receptor Gamma	Protein Coding	37	GC11P072114	6.28
IRS2	Insulin Receptor Substrate 2	Protein Coding	44	GC13M109752	6.27
ACVR1B	Activin A Receptor Type 1B	Protein Coding	47	GC12P051951	6.25
ZIC4	Zic Family Member 4	Protein Coding	37	GC03M147386	6.23
DMC1	DNA Meiotic Recombinase 1	Protein Coding	41	GC22M045386	6.21
MIR30C1	MicroRNA 30c-1	RNA Gene	21	GC01P040757	6.21
CHD7	Chromodomain Helicase DNA Binding Protein 7	Protein Coding	45	GC08P060678	6.2
SDHD	Succinate Dehydrogenase Complex Subunit D	Protein Coding	44	GC11P112087	6.2
MACROD1	Mono-ADP Ribosylhydrolase 1	Protein Coding	35	GC11M063998	6.19
PRSS1	Serine Protease 1	Protein Coding	45	GC07P144938	6.17
MIR486-1	MicroRNA 486-1	RNA Gene	16	GC08M041660	6.17
PISRT1	PISRT1 LncRNA	RNA Gene	14	GC03M139232	6.16
XRCC1	X-Ray Repair Cross Complementing 1	Protein Coding	43	GC19M043543	6.14
NES	Nestin	Protein Coding	39	GC01M156668	6.13
MSR1	Macrophage Scavenger Receptor 1	Protein Coding	46	GC08M016107	6.12
KAT7	Lysine Acetyltransferase 7	Protein Coding	42	GC17P049788	6.11
LIPE	Lipase E, Hormone Sensitive Type	Protein Coding	47	GC19M042401	6.1
SATB2	SATB Homeobox 2	Protein Coding	44	GC02M199269	6.08
RAD54L	RAD54 Like	Protein Coding	45	GC01P046258	6.05
VSIG1	V-Set And Immunoglobulin Domain Containing 1	Protein Coding	34	GC0XP108044	6.04
SOX14	SRY-Box Transcription Factor 14	Protein Coding	39	GC03P137764	6.04
FOXE3	Forkhead Box E3	Protein Coding	35	GC01P047416	6.04
BPESC1	Blepharophimosis, Epicanthus Inversus And Ptosis Candidate 1	RNA Gene	20	GC03P139104	6.04
SPATA8-AS1	SPATA8 Antisense RNA 1 (Head To Head)	RNA Gene	12	GC15M096772	6.04
IGFBP6	Insulin Like Growth Factor Binding Protein 6	Protein Coding	42	GC12P053097	6.03
TSC1	TSC Complex Subunit 1	Protein Coding	48	GC09M132891	6.02
KDM6A	Lysine Demethylase 6A	Protein Coding	46	GC0XP044873	6.01
FGFR4	Fibroblast Growth Factor Receptor 4	Protein Coding	51	GC05P177086	6
MIR373	MicroRNA 373	RNA Gene	20	GC19P054634	5.99
VCP	Valosin Containing Protein	Protein Coding	48	GC09M035056	5.98
OTUB1	OTU Deubiquitinase, Ubiquitin Aldehyde Binding 1	Protein Coding	39	GC11P063985	5.95
ANXA4	Annexin A4	Protein Coding	44	GC02P069644	5.95
NUPR1	Nuclear Protein 1, Transcriptional Regulator	Protein Coding	35	GC16M028548	5.94
MARK1	Microtubule Affinity Regulating Kinase 1	Protein Coding	41	GC01P220528	5.94
TET2	Tet Methylcytosine Dioxygenase 2	Protein Coding	44	GC04P105145	5.93
TSC2	TSC Complex Subunit 2	Protein Coding	50	GC16P002436	5.91
NTRK3	Neurotrophic Receptor Tyrosine Kinase 3	Protein Coding	51	GC15M087859	5.91
TTR	Transthyretin	Protein Coding	49	GC18P031557	5.86
RPS4X	Ribosomal Protein S4 X-Linked	Protein Coding	39	GC0XM072255	5.85
PDPN	Podoplanin	Protein Coding	40	GC01P013583	5.84
ANOS1	Anosmin 1	Protein Coding	36	GC0XM008528	5.83
MIR202	MicroRNA 202	RNA Gene	17	GC10M133247	5.83
SFRP4	Secreted Frizzled Related Protein 4	Protein Coding	43	GC07M037912	5.82
PTPN11	Protein Tyrosine Phosphatase Non-Receptor Type 11	Protein Coding	53	GC12P112418	5.82
MSH5-SAPCD1	MSH5-SAPCD1 Readthrough (NMD Candidate)	RNA Gene	16	GC06P047323	5.77
FAM198B-AS1	FAM198B Antisense RNA 1	RNA Gene	10	GC04P158171	5.76
PAX3	Paired Box 3	Protein Coding	47	GC02M222199	5.76
ACVR2A	Activin A Receptor Type 2A	Protein Coding	45	GC02P147844	5.75
TNFAIP3	TNF Alpha Induced Protein 3	Protein Coding	48	GC06P137866	5.75
IHH	Indian Hedgehog Signaling Molecule	Protein Coding	47	GC02M219054	5.74
MT-CYB	Mitochondrially Encoded Cytochrome B	Protein Coding	31	GCMTP014749	5.7
ST8	Suppression Of Tumorigenicity 8 (Ovarian)	Genetic Locus	3	GC06U990118	5.7
PDGFRL	Platelet Derived Growth Factor Receptor Like	Protein Coding	41	GC08P017576	5.69
TFPI2	Tissue Factor Pathway Inhibitor 2	Protein Coding	41	GC07M093885	5.69
MIR744	MicroRNA 744	RNA Gene	15	GC17P012081	5.69
IL2RA	Interleukin 2 Receptor Subunit Alpha	Protein Coding	50	GC10M006010	5.68
CD47	CD47 Molecule	Protein Coding	43	GC03M108043	5.68
ROR1	Receptor Tyrosine Kinase Like Orphan Receptor 1	Protein Coding	47	GC01P063774	5.67
FLT4	Fms Related Receptor Tyrosine Kinase 4	Protein Coding	52	GC05M180607	5.66
NCOR1	Nuclear Receptor Corepressor 1	Protein Coding	43	GC17M016029	5.65
MIR15B	MicroRNA 15b	RNA Gene	18	GC03P160404	5.64
PAX2	Paired Box 2	Protein Coding	46	GC10P100735	5.6
FANCD2	FA Complementation Group D2	Protein Coding	47	GC03P010026	5.6
AKR1C3	Aldo-Keto Reductase Family 1 Member C3	Protein Coding	47	GC10P005035	5.59
FGF17	Fibroblast Growth Factor 17	Protein Coding	45	GC08P022042	5.57
MAPK10	Mitogen-Activated Protein Kinase 10	Protein Coding	51	GC04M085990	5.55
HMGA1	High Mobility Group AT-Hook 1	Protein Coding	46	GC06P047417	5.54
CDKN1C	Cyclin Dependent Kinase Inhibitor 1C	Protein Coding	47	GC11M002887	5.54
GREM1	Gremlin 1, DAN Family BMP Antagonist	Protein Coding	44	GC15P032720	5.54
HSD17B2	Hydroxysteroid 17-Beta Dehydrogenase 2	Protein Coding	44	GC16P082068	5.53
LRRC56	Leucine Rich Repeat Containing 56	Protein Coding	36	GC11P000518	5.51
MIR19B1	MicroRNA 19b-1	RNA Gene	17	GC13P091435	5.51
IL18	Interleukin 18	Protein Coding	44	GC11M112143	5.51
BAD	BCL2 Associated Agonist Of Cell Death	Protein Coding	46	GC11M064273	5.49
BAP1	BRCA1 Associated Protein 1	Protein Coding	45	GC03M052401	5.49
NR3C1	Nuclear Receptor Subfamily 3 Group C Member 1	Protein Coding	50	GC05M143277	5.48
FREM1	FRAS1 Related Extracellular Matrix 1	Protein Coding	41	GC09M014730	5.48
BEX3	Brain Expressed X-Linked 3	Protein Coding	31	GC0XP103377	5.47
MKS1	MKS Transition Zone Complex Subunit 1	Protein Coding	40	GC17M058205	5.47
HMMR	Hyaluronan Mediated Motility Receptor	Protein Coding	42	GC05P163480	5.47
UGT1A1	UDP Glucuronosyltransferase Family 1 Member A1	Protein Coding	48	GC02P233760	5.47
WDR11	WD Repeat Domain 11	Protein Coding	37	GC10P120851	5.44
MIR1307	MicroRNA 1307	RNA Gene	17	GC10M103394	5.43
MIR203A	MicroRNA 203a	RNA Gene	19	GC14P104655	5.42
CDK12	Cyclin Dependent Kinase 12	Protein Coding	40	GC17P039461	5.42
PRKD1	Protein Kinase D1	Protein Coding	50	GC14M029576	5.4
NRXN1	Neurexin 1	Protein Coding	47	GC02M049918	5.4
TH2-LCR	Th2 Cytokine Locus Control Region	Biological Region	1	GC05P132629	5.4
LIG4	DNA Ligase 4	Protein Coding	48	GC13M108207	5.4
DUPXQ27.3Q28	Chromosome Xq27.3-Q28 Duplication Syndrome	Genetic Locus	2	GC0XU901813	5.4
ROR2	Receptor Tyrosine Kinase Like Orphan Receptor 2	Protein Coding	48	GC09M091564	5.39
CD8A	CD8a Molecule	Protein Coding	46	GC02M086784	5.39
BID	BH3 Interacting Domain Death Agonist	Protein Coding	45	GC22M017734	5.39
RHOC	Ras Homolog Family Member C	Protein Coding	41	GC01M112701	5.37
NOS2	Nitric Oxide Synthase 2	Protein Coding	49	GC17M027756	5.35
ALMS1	ALMS1 Centrosome And Basal Body Associated Protein	Protein Coding	41	GC02P073385	5.35
OXT	Oxytocin/Neurophysin I Prepropeptide	Protein Coding	40	GC20P003068	5.35
S100A1	S100 Calcium Binding Protein A1	Protein Coding	41	GC01P153627	5.34
PRKAA2	Protein Kinase AMP-Activated Catalytic Subunit Alpha 2	Protein Coding	50	GC01P056645	5.33
SETD2	SET Domain Containing 2, Histone Lysine Methyltransferase	Protein Coding	47	GC03M047033	5.32
DUSP3	Dual Specificity Phosphatase 3	Protein Coding	45	GC17M043766	5.31
CHUK	Component Of Inhibitor Of Nuclear Factor Kappa B Kinase Complex	Protein Coding	52	GC10M100188	5.3
SMO	Smoothened, Frizzled Class Receptor	Protein Coding	48	GC07P129463	5.3
TMEM97	Transmembrane Protein 97	Protein Coding	35	GC17P028319	5.29
